# Supplementary material for: Biosynthetic insights provided by unusual sesterterpenes from the medicinal herb Aletris farinosa
Source: Royal Society of Chemistry journal article supplement (doi:10.1039/c5sc02056e), 2015-01-01
Supplement: c5sc02056e1.pdf [file c5sc02056e1.pdf]

# Biosynthetic Insights Provided by Unusual Sesterterpenes from the Medicinal Herb *Aletris farinosa*

*Victoria L. Challinor, Ryne C. Johnston, Paul V. Bernhardt, Reginald P. Lehmann, Elizabeth H. Krenske, and James J. De Voss*

## Supplementary Information

|                                                                                                                       |    |
|-----------------------------------------------------------------------------------------------------------------------|----|
| General Experimental Procedures                                                                                       | 3  |
| Plant Material                                                                                                        | 3  |
| Extraction and Isolation                                                                                              | 3  |
| Esterification of <b>2</b> to produce <b>7</b>                                                                        | 4  |
| Esterification of <b>4</b> to produce <b>3</b>                                                                        | 5  |
| Treatment of <b>6</b> with acid                                                                                       | 5  |
| X-ray Crystallographic Data for <b>6</b>                                                                              | 6  |
| Figure S1. ORTEP view of <b>6</b>                                                                                     | 6  |
| Table S1. <sup>1</sup> H and <sup>13</sup> C NMR spectroscopic data for <b>2</b> , <b>3</b> , <b>5</b> , and <b>6</b> | 7  |
| <sup>1</sup> H and <sup>13</sup> C NMR spectra of <b>2</b>                                                            | 8  |
| <sup>1</sup> H and <sup>13</sup> C NMR spectra of <b>3</b>                                                            | 9  |
| <sup>1</sup> H and <sup>13</sup> C NMR spectra of <b>4</b>                                                            | 10 |
| <sup>1</sup> H and <sup>13</sup> C NMR spectra of <b>5</b>                                                            | 11 |
| <sup>1</sup> H and <sup>13</sup> C NMR spectra of <b>6</b>                                                            | 12 |
| Computational Methodology                                                                                             | 13 |
| Preferred Conformation of the C3- $\alpha$ Epimer of <b>5</b>                                                         | 13 |
| Optimized geometries of conformers of C3-epi- <b>5</b> at the PCM <sub>pyridine</sub> /B3LYP/6-31G(d,p)               |    |
| level of theory                                                                                                       | 14 |
| General Notes on NMR Shift Calculations                                                                               | 19 |
| Table S2. Scaling factors for the present level of theory                                                             | 19 |
| Table S3. Comparison of Computed NMR shifts for Each Diastereomer of <b>5</b>                                         | 20 |

|                                                                                                                                |    |
|--------------------------------------------------------------------------------------------------------------------------------|----|
| Table S4. Comparison of Weighted Average Computed NMR shifts for (1 <i>S</i> *,17 <i>S</i> *,18 <i>S</i> *)- <b>5</b>          | 22 |
| Table S5. Computed Chemical Shifts for (1 <i>S</i> *,17 <i>S</i> *,18 <i>S</i> *)- <b>5</b>                                    | 23 |
| Molecular geometries of diastereomers of compound <b>5</b> at the PCM <sub>pyridine</sub> /B3LYP/6-31G(d,p)<br>level of theory | 25 |
| Theoretical Prediction of Optical Rotation of <b>5</b>                                                                         | 42 |
| Figure S2. Comparison of experimental and calculated [ $\alpha$ ] <sub>D</sub> values for the enantiomers of <b>5</b>          | 42 |
| Optimized geometry of <b>5</b> at the B3LYP/6-31G(d) level of theory                                                           | 43 |
| Carbocation Rearrangements Leading to <b>5</b> and <b>6</b>                                                                    | 45 |
| Optimized geometries at the B3LYP/6-31+G(d,p) level of theory                                                                  | 45 |
| References                                                                                                                     | 55 |

## General Experimental Procedures

Optical rotations were measured on a JASCO P-2000 polarimeter.  $^1\text{H}$  and  $^{13}\text{C}$  NMR spectra were recorded on a Bruker AV400 or AV500 as indicated, with the residual protonated pyridine- $d_5$  ( $\delta_{\text{H}}$  8.71 ppm;  $\delta_{\text{C}}$  149.9 ppm) or chloroform ( $\delta_{\text{H}}$  7.24 ppm;  $\delta_{\text{C}}$  77.0 ppm) signal as internal standard.  $J$  values are expressed in Hz. Low-resolution mass spectra were recorded on a Bruker ESQUIRE HCT instrument (positive and negative-ion ESI). High-resolution mass spectra were recorded on a Bruker MicrOTOF-Q instrument (positive and negative-ion ESI) with internal calibration using Agilent Tune-Mix. RPHPLC was performed on a Shimadzu LC-10AT liquid chromatograph equipped with an ELSD-LT detector (52°C,  $\text{N}_2$  pressure: 200 KPa), column oven (30°C), and a semi-preparative Phenomenex HPLC column (Luna C-18, 5  $\mu\text{m}$ , 250  $\times$  10 mm). GSMS spectra were recorded on a Shimadzu GCMS QP2010-plus spectrometer; ZB-5MS column – 30 m. Standard GCMS program: column flow 1.7 mL/min; total flow 66.3 mL/min; injector 250°C; detector 250°C; oven 200°C held for 1 min, increased to 300°C (20°C/min) and held for 44 min; total program time 50 min.

## Plant Material

A voucher specimen of *A. farinosa* was collected in the Midlands Wildlife Area, Delaware, USA (September 2011), and has been deposited at the Medicinal Plant Herbarium, Southern Cross University, Lismore, Australia (accession number PHARM-110043), where it was identified by Dr. H. Wohlmuth.

## Extraction and Isolation

Powdered roots of *A. farinosa* (23 g) were extracted (80% MeOH(aq), 250 mL) with sonication (60 min). Following filtration and removal of the solvent in vacuo, the crude extract was partially purified via solid-phase extraction (Phenomenex Strata C-18E cartridge) eluting with  $\text{H}_2\text{O}$  followed by MeOH. The combined MeOH fractions were concentrated in vacuo, dissolved (90% MeOH(aq)),

10 mL), filtered, and purified by semipreparative RPHPLC (gradient of 20% to 100% aqueous CH<sub>3</sub>CN over 60 min, 2 mL/min). Five different fractions were collected, numbered I-V in order of elution. Fractions I-III were pure and corresponded to compounds **2** ( $t_R = 47.7$  min, 19.8 mg) and **4** ( $t_R = 50.4$  min, 10.1 mg) and **1**<sup>[1]</sup> ( $t_R = 57.0$  min, 79 mg). Fraction IV ( $t_R = 59.4$  min) was subjected to further purification via semipreparative RPHPLC (isocratic conditions of 75% aqueous CH<sub>3</sub>CN over 40 min) to yield **5** ( $t_R = 35.5$  min, 2.8 mg). Fraction V ( $t_R = 61.2$  min) was subjected to further purification via semipreparative RPHPLC (isocratic conditions of 70% aqueous CH<sub>3</sub>CN over 20 min) to yield **3** ( $t_R = 53.9$  min, 3.1 mg) and **6** ( $t_R = 56.2$  min, 1.9 mg). Compounds **1-4** have been previously reported in the patent literature,<sup>[2]</sup> albeit with differing, apparently erroneous, stereochemistry of the  $\Delta^{17(18)}$  double bond. Compounds **1**, **2**, and **3** display <sup>1</sup>H and <sup>13</sup>C NMR chemical shifts that are in good agreement with the values reported by Takikawa and coworkers;<sup>[2]</sup> compound **4** can be converted to **3** via esterification (*vide infra*), confirming their structural relationship.

**Compound 2:** amorphous solid;  $[\alpha]^{25}_D - 26$  ( $c$  0.15, CHCl<sub>3</sub>); <sup>1</sup>H (pyridine-*d*<sub>5</sub>, 400 MHz) and <sup>13</sup>C NMR (pyridine-*d*<sub>5</sub>, 100 MHz), see Table 1; positive-ion ESIMS  $m/z$  515; negative-ion ESIMS  $m/z$  491; HRESIMS  $m/z$  491.3005 [ $M - H$ ]<sup>-</sup> (calcd for C<sub>28</sub>H<sub>43</sub>O<sub>7</sub>, 491.3014). The <sup>1</sup>H NMR (chloroform-*d*, 400 MHz) chemical shifts of **2** were in close agreement with those reported for the corresponding planar structure ( $\Delta\delta_H \leq 0.02$  ppm for selected key shifts).<sup>[2]</sup> For <sup>13</sup>C NMR (chloroform-*d*, 100 MHz), the observed peaks (resonances for C1'-C-3' and C-19 were not detected in our <sup>13</sup>C NMR experiments) were in good agreement with those reported ( $\Delta\delta_C \leq 0.3$  ppm), with the exception of C-13 ( $\delta_C$  73.1), which appeared 1.3 ppm upfield of the literature value ( $\delta_C$  74.4).<sup>[2]</sup>

**Esterification of 2 to produce 7:** Compound **2** (2 mg) was dissolved in MeOH (1 mL) before addition of ethereal CH<sub>2</sub>N<sub>2</sub> (500  $\mu$ L). The solution was stirred at 25°C for 30 min, before concentration to dryness under a stream of nitrogen, yielding a compound with identical <sup>1</sup>H and <sup>13</sup>C NMR spectra to those of diester **7** derived from naturally occurring **1**.<sup>[1]</sup>

**Compound 3:** amorphous solid;  $[\alpha]_D - 32$  ( $c$  0.26,  $\text{CHCl}_3$ );  $^1\text{H}$  (pyridine- $d_5$ , 500 MHz) and  $^{13}\text{C}$  NMR (pyridine- $d_5$ , 125 MHz), see Table 1; positive-ion ESIMS  $m/z$  443; HRESIMS  $m/z$  443.3136  $[\text{M} + \text{Na}]^+$  (calcd for  $\text{C}_{26}\text{H}_{44}\text{NaO}_4$ , 443.3132). The  $^1\text{H}$  (chloroform- $d$ , 500 MHz) and  $^{13}\text{C}$  NMR (chloroform- $d$ , 125 MHz) chemical shifts of **3** were in close agreement ( $\Delta\delta_{\text{H}} \leq 0.06$  ppm for selected key shifts,  $\Delta\delta_{\text{C}} \leq 0.2$  ppm) with those reported for the corresponding planar structure.<sup>[2]</sup>

**Compound 4:** amorphous solid;  $[\alpha]_D - 26$  ( $c$  0.38,  $\text{CHCl}_3$ );  $^1\text{H}$  (pyridine- $d_5$ , ... MHz) and  $^{13}\text{C}$  NMR (pyridine- $d_5$ , 100 MHz); positive-ion ESIMS  $m/z$  429; negative-ion ESIMS  $m/z$  405; HRESIMS  $m/z$  405.3001  $[\text{M} - \text{H}]^-$  (calcd for  $\text{C}_{25}\text{H}_{41}\text{O}_4$ , 405.3010).  $^1\text{H}$  NMR (pyridine- $d_5$ , 500 MHz)  $\delta_{\text{H}}$  6.06 (s, 1H), 3.60 (t,  $J = 2.6$  Hz, 1H), 3.21 (m, 1H), 2.90 (m, 1H), 1.97-2.06 (m, 3H), 1.92 (d,  $J = 1.1$  Hz, 3H,  $\text{H}_3$ -20), 1.34 (s, 3H,  $\text{H}_3$ -21), 1.18-1.88 (m, 11H), 1.17 (s, 3H,  $\text{H}_3$ -24), 1.05-1.12 (m, 1H), 0.89 (s, 3H,  $\text{H}_3$ -25), 0.85 (s, 7H,  $\text{H}_3$ -22 and  $\text{H}_3$ -23);  $^{13}\text{C}$  NMR (pyridine- $d_5$ , 125 MHz)  $\delta_{\text{C}}$  170.3, 158.8, 118.8, 75.3, 73.4, 62.5, 60.6, 49.3, 44.6, 41.6, 39.7, 38.1, 37.7, 37.6, 33.7, 29.3, 26.6, 25.4, 24.8, 24.6, 22.4, 19.7, 18.2, 17.0, 16.5.

**Esterification of 4 to produce 3:** Compound **4** (2 mg) was dissolved in MeOH (1 mL) before addition of ethereal  $\text{CH}_2\text{N}_2$  (500  $\mu\text{L}$ ). The solution was stirred at 25°C for 30 min, before concentration to dryness under a stream of nitrogen, yielding a compound with identical  $^1\text{H}$  and  $^{13}\text{C}$  NMR spectra to those of **3**.

**Compound 5:** amorphous solid;  $[\alpha]_D + 32$  ( $c$  0.23,  $\text{CHCl}_3$ );  $^1\text{H}$  (pyridine- $d_5$ , 500 MHz) and  $^{13}\text{C}$  NMR (pyridine- $d_5$ , 125 MHz), see Table 1; positive-ion ESIMS  $m/z$  397; negative-ion ESIMS  $m/z$  373; HRESIMS  $m/z$  397.3073  $[\text{M} + \text{Na}]^+$  (calcd for  $\text{C}_{25}\text{H}_{42}\text{NaO}_2$ , 397.3077).

**Compound 6:** amorphous solid;  $[\alpha]_D + 64$  ( $c$  0.12,  $\text{CHCl}_3$ );  $^1\text{H}$  (pyridine- $d_5$ , 500 MHz) and  $^{13}\text{C}$  NMR (pyridine- $d_5$ , 125 MHz), see Table 1; positive-ion ESIMS  $m/z$  395; negative-ion ESIMS  $m/z$  387; HRESIMS  $m/z$  395.2921  $[\text{M} + \text{Na}]^+$  (calcd for  $\text{C}_{25}\text{H}_{40}\text{NaO}_2$ , 395.2921).

**Treatment of 6 with acid:** Using a protocol adapted from Brownlie et al.,<sup>[3]</sup> a solution of **6** (1mg) in acetic acid (2.4 mL) and conc. HCl (600  $\mu\text{L}$ ) was heated under reflux for 18 h before cooling to rt. To a sample of the reaction mixture (500  $\mu\text{L}$ )

was added DCM (5 mL) and saturated sodium bicarbonate (5 mL). The organic layer was dried over sodium sulfate and concentrated under a stream of nitrogen to a volume of approximately 100  $\mu\text{L}$ . GCMS analysis indicated that the major product had undergone elimination of water (**6**:  $t_{\text{R}} = 9.0$  min,  $m/z$  372; Major product:  $t_{\text{R}} = 6.1$  min,  $m/z$  354).

### X-ray Crystallographic Data for **6**

$\text{C}_{25}\text{H}_{40}\text{O}_2$ ,  $M_{\text{r}}$  372.59, specimen  $0.20 \times 0.20 \times 0.15$  mm, monoclinic,  $P2_1$  (No. 4),  $a$  14.0700(5),  $b$  10.4060(3),  $c$  14.8885(4) Å,  $\beta$  103.249(3)°,  $V$  2121.8(1) Å<sup>3</sup>,  $Z$  4,  $\rho_{\text{calc}}$  1.166 g cm<sup>-3</sup>,  $\mu$  0.543 mm<sup>-1</sup>, Cu-K $\alpha$   $\lambda$  1.5418 Å,  $T$  190 K,  $2\theta_{\text{max}}$  125°,  $N_{\text{total}}$  31189,  $N_{\text{unique}}$  6711,  $N_{\text{obs}}$  ( $I > 2\sigma$ ) 6365,  $R_{\text{int}}$  0.0365,  $R$  (obs. data) 0.0446,  $wR_2$  (all data) 0.1279, residual electron density +0.83 and -0.33 e Å<sup>-3</sup>. Data were acquired on an Oxford Diffraction Gemini CCD diffractometer with the crystal cooled by an Oxford Cryosystems Desktop Cooler. The structure was solved by direct methods with SHELXS and refined by full matrix least squares analysis with SHELXL97<sup>[4]</sup> within the WinGX interface.<sup>[5]</sup> The structure diagram was drawn with ORTEP3<sup>[6]</sup> and rendered with PovRay (version 3.6). The absolute configuration was established by the analysis of 3128 Bijvoet pairs according to the method of Hooft *et al.*<sup>[7]</sup> The probability of the correct enantiomer  $P2$  was 1.00, with a Hooft parameter 0.2(1) ( $\nu = 15$ , Student's  $t$  statistics). Data in CIF format have been deposited with the Cambridge Crystallographic Data Centre (CCDC No. 1000114).

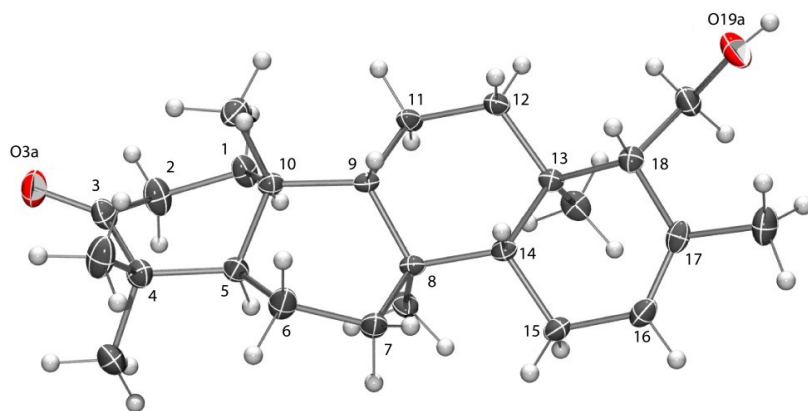

**Figure S1.** ORTEP view of **6** (30% probability ellipsoids). The ring C-atom numbering is shown.

**Table S1.**  $^1\text{H}$  and  $^{13}\text{C}$  NMR spectroscopic data for compounds **2**, **3**, **5**, and **6**.

| Position | <b>2<sup>a</sup></b>                      |                 | <b>3<sup>a</sup></b>                      |                 | <b>5<sup>b</sup></b>                      |                 | <b>6<sup>b</sup></b>                      |                 |
|----------|-------------------------------------------|-----------------|-------------------------------------------|-----------------|-------------------------------------------|-----------------|-------------------------------------------|-----------------|
|          | $^1\text{H}$ [ $\delta$ , mult, $J$ (Hz)] | $^{13}\text{C}$ | $^1\text{H}$ [ $\delta$ , mult, $J$ (Hz)] | $^{13}\text{C}$ | $^1\text{H}$ [ $\delta$ , mult, $J$ (Hz)] | $^{13}\text{C}$ | $^1\text{H}$ [ $\delta$ , mult, $J$ (Hz)] | $^{13}\text{C}$ |
| 1a       | 1.30-1.44 m <sup>c</sup>                  | 34.1            | 1.70 m <sup>c</sup>                       | 33.7            | 2.00 m <sup>c</sup>                       | 21.0            | 1.95 m <sup>c</sup>                       | 31.7            |
| 1b       | 1.30-1.44 m <sup>c</sup>                  |                 | 1.45 m <sup>c</sup>                       |                 | 1.60 m                                    |                 | 1.37 m <sup>c</sup>                       |                 |
| 2a       | 1.79-1.92 m <sup>c</sup>                  | 23.2            | 2.02 m <sup>c</sup>                       | 26.6            | 1.91-2.04 m <sup>c</sup>                  | 30.1            | 2.72 ddd (15.7, 11.9, 6.0)                | 33.9            |
| 2b       | 1.79-1.92 m <sup>c</sup>                  |                 | 1.78 m                                    |                 | 1.91-2.04 m <sup>c</sup>                  |                 | 2.32 ddd (15.7, 9.7, 3.0)                 |                 |
| 3        | 4.93 br s                                 | 79.2            | 3.60 m <sup>c</sup>                       | 75.3            | 3.74 m                                    | 76.0            |                                           | 218.8           |
| 4        |                                           | 37.1            |                                           | 38.1            |                                           | 41.6            |                                           | 47.0            |
| 5        | 1.48 m <sup>c</sup>                       | 50.6            | 1.71 m <sup>c</sup>                       | 49.2            |                                           | 143.5           | 2.23 dd (13.1, 2.0)                       | 45.1            |
| 6a       | 1.31-1.44 m <sup>c</sup>                  | 18.0            | 1.53 m                                    | 18.3            | 5.62 m                                    | 119.3           | 1.35 m <sup>c</sup>                       | 19.1            |
| 6b       | 1.31-1.44 m <sup>c</sup>                  |                 | 1.44 m <sup>c</sup>                       |                 |                                           |                 | 1.23 m <sup>c</sup>                       |                 |
| 7a       | 2.00 m <sup>c</sup>                       | 41.3            | 2.06 m <sup>c</sup>                       | 41.7            | 2.29 m                                    | 22.9            | 1.33-1.45 m <sup>c</sup>                  | 39.7            |
| 7b       | 1.17 m                                    |                 | 1.21 m                                    |                 | 2.08 dd (19.0, 5.8)                       |                 | 1.33-1.45 m <sup>c</sup>                  |                 |
| 8        |                                           | 39.6            |                                           | 39.7            | 1.13 m <sup>c</sup>                       | 55.9            |                                           | 36.9            |
| 9        | 1.03 m <sup>c</sup>                       | 60.5            | 1.09 m                                    | 60.7            |                                           | 35.8            | 0.94 dd (11.0, 3.8)                       | 52.1            |
| 10       |                                           | 37.5            |                                           | 37.7            | 2.51 m                                    | 37.3            |                                           | 36.1            |
| 11a      | 1.52 m <sup>c</sup>                       | 19.6            | 1.64 m <sup>c</sup>                       | 19.7            | 2.01 m <sup>c</sup>                       | 38.5            | 1.35 m <sup>c</sup>                       | 19.1            |
| 11b      | 1.24 m <sup>c</sup>                       |                 | 1.29 m <sup>c</sup>                       |                 | 1.13 m <sup>c</sup>                       |                 | 1.35 m <sup>c</sup>                       |                 |
| 12a      | 1.97 m <sup>c</sup>                       | 44.4            | 2.01 m <sup>c</sup>                       | 44.8            | 1.38-1.49 m <sup>c</sup>                  | 19.1            | 2.18 dt (12.8, 3.2)                       | 41.1            |
| 12b      | 1.66 m <sup>c</sup>                       |                 | 1.70 m <sup>c</sup>                       |                 | 1.38-1.49 m <sup>c</sup>                  |                 | 1.17 m <sup>c</sup>                       |                 |
| 13       |                                           | 73.3            |                                           | 73.2            | 1.48 m <sup>c</sup>                       | 47.0            |                                           | 36.9            |
| 14       | 1.38 m                                    | 62.5            | 1.38 t (3.9)                              | 62.8            |                                           | 39.0            | 1.14 m <sup>c</sup>                       | 56.5            |
| 15a      | 1.88 m <sup>c</sup>                       | 24.8            | 1.85 m                                    | 24.5            | 1.49 m <sup>c</sup>                       | 34.9            | 1.99 m <sup>c</sup>                       | 23.2            |
| 15b      | 1.64 m <sup>c</sup>                       |                 | 1.60 m <sup>c</sup>                       |                 | 1.15 m <sup>c</sup>                       |                 | 1.88 m <sup>c</sup>                       |                 |
| 16a      | 3.11 m                                    | 37.6            | 3.04 td (11.9, 5.8)                       | 37.7            | 1.99 m <sup>c</sup>                       | 26.2            | 5.57 m                                    | 122.8           |
| 16b      | 2.96 m                                    |                 | 2.94 td (11.7, 4.7)                       |                 | 1.34 m <sup>c</sup>                       |                 |                                           |                 |
| 17       |                                           | 160.4 br        |                                           | 162.5           | 1.93 m <sup>c</sup>                       | 35.7            |                                           | 134.9           |
| 18       | 6.04 br s                                 | 117.6 br        | 5.77 d (1.1)                              | 115.5           |                                           | 39.8            | 2.09 m <sup>c</sup>                       | 58.3            |
| 19a      |                                           | <i>n.d.</i>     |                                           | 166.9           | 3.70 dd (10.2, 4.4)                       | 69.6            | 4.11 dt (10.8, 3.1)                       | 60.1            |
| 19b      |                                           |                 |                                           |                 | 3.60 m                                    |                 | 3.93 dt (10.7, 5.3)                       |                 |
| 20       | 1.93                                      | 25.5            | 1.90 d (1.2)                              | 25.3            | 1.27 d (7.1)                              | 15.7            | 2.08 br s                                 | 22.5            |
| 21       | 1.32 s                                    | 24.7            | 1.34 s                                    | 24.5            | 1.14 s                                    | 20.2            | 0.98 s                                    | 15.5            |
| 22       | 0.81 s                                    | 17.0            | 0.87 s                                    | 17.0            | 1.04 s                                    | 16.5            | 1.08 s                                    | 21.7            |
| 23       | 0.77 s                                    | 16.2            | 0.86 s                                    | 16.5            | 0.96 s                                    | 28.7            | 0.73 s                                    | 22.7            |
| 24       | 0.99 s                                    | 28.2            | 1.17 s                                    | 29.3            | 1.14 s                                    | 28.2            | 1.06 s                                    | 29.1            |
| 25       | 0.83                                      | 21.8            | 0.89 s                                    | 22.4            | 1.42 s                                    | 26.4            | 1.09 s                                    | 19.8            |
| 26       |                                           |                 | 3.61 s                                    | 50.8            |                                           |                 |                                           |                 |
| 1'       |                                           | <i>n.d.</i>     |                                           |                 |                                           |                 |                                           |                 |
| 2'       | <i>n.d.</i>                               | <i>n.d.</i>     |                                           |                 |                                           |                 |                                           |                 |
| 3'       |                                           | <i>n.d.</i>     |                                           |                 |                                           |                 |                                           |                 |

<sup>a</sup>Acquired in pyridine-*d*<sub>5</sub> (500 MHz for  $^1\text{H}$  and 100 MHz for  $^{13}\text{C}$ ).

<sup>b</sup>Acquired in pyridine-*d*<sub>5</sub> (500 MHz for  $^1\text{H}$  and 125 MHz for  $^{13}\text{C}$ ).

<sup>c</sup>Indicates overlapping signals within column.

*n.d.* Signals for the carboxylate (C-19) and malonate (C-1'-C-3') moieties were not detected, however esterification of **2** yielded a compound with identical spectroscopic properties to those of previously reported diester **7**.<sup>[1]</sup>

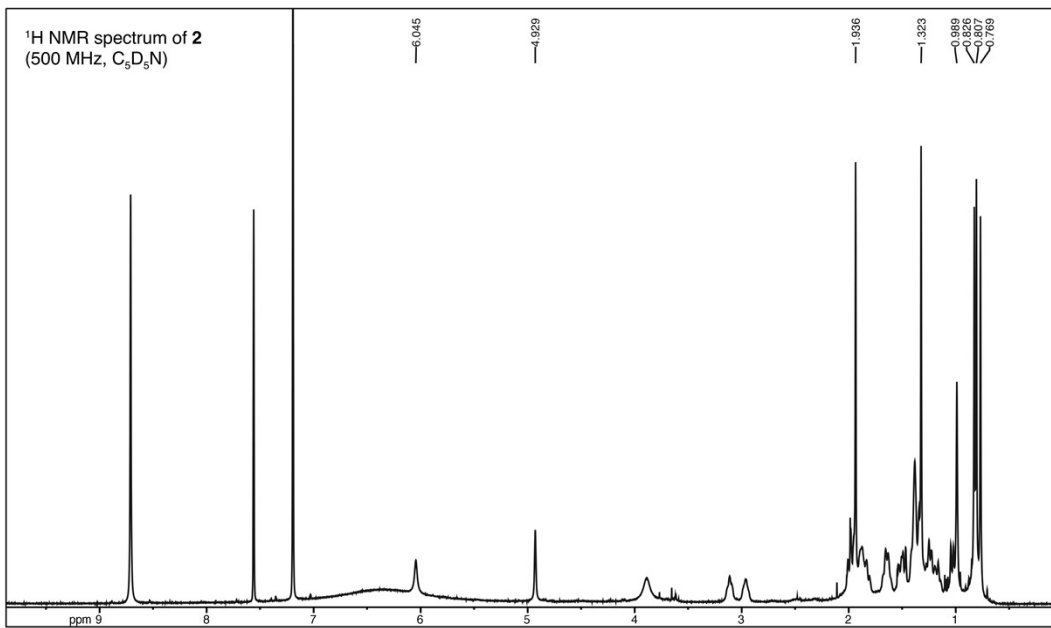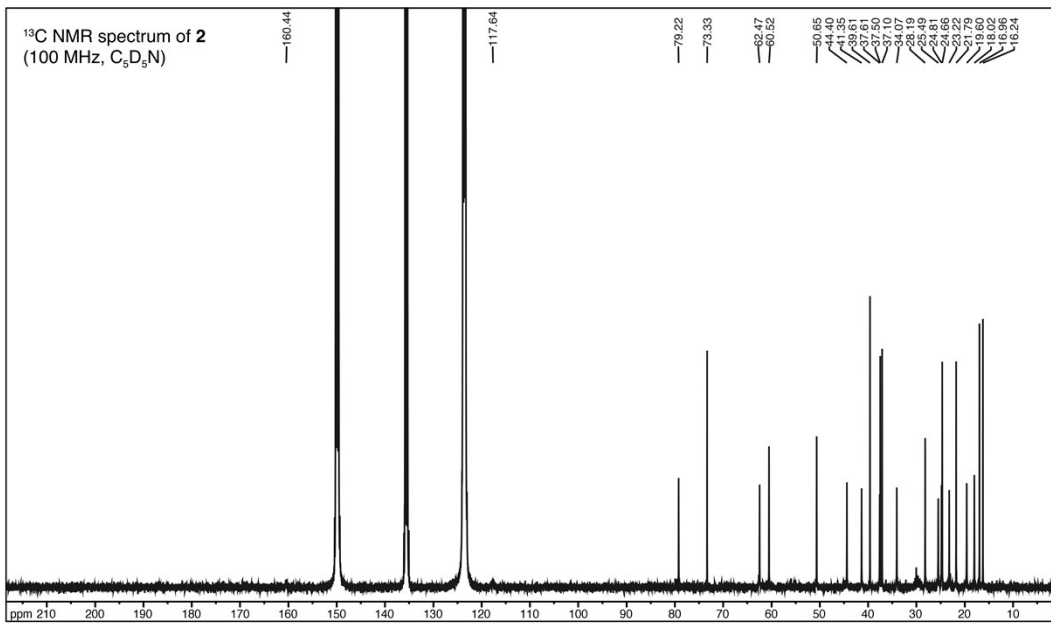



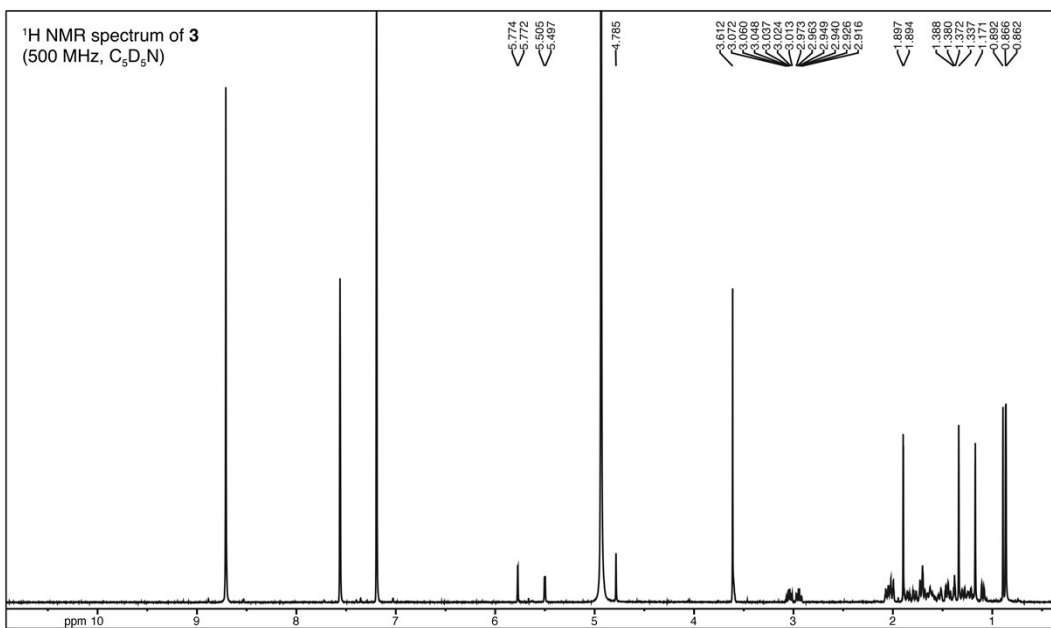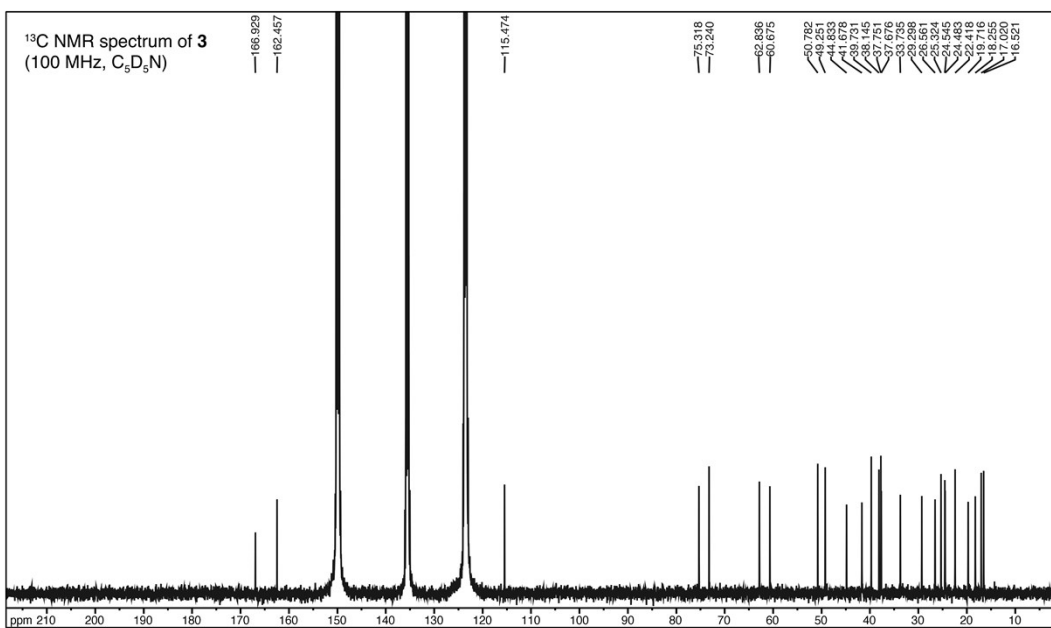

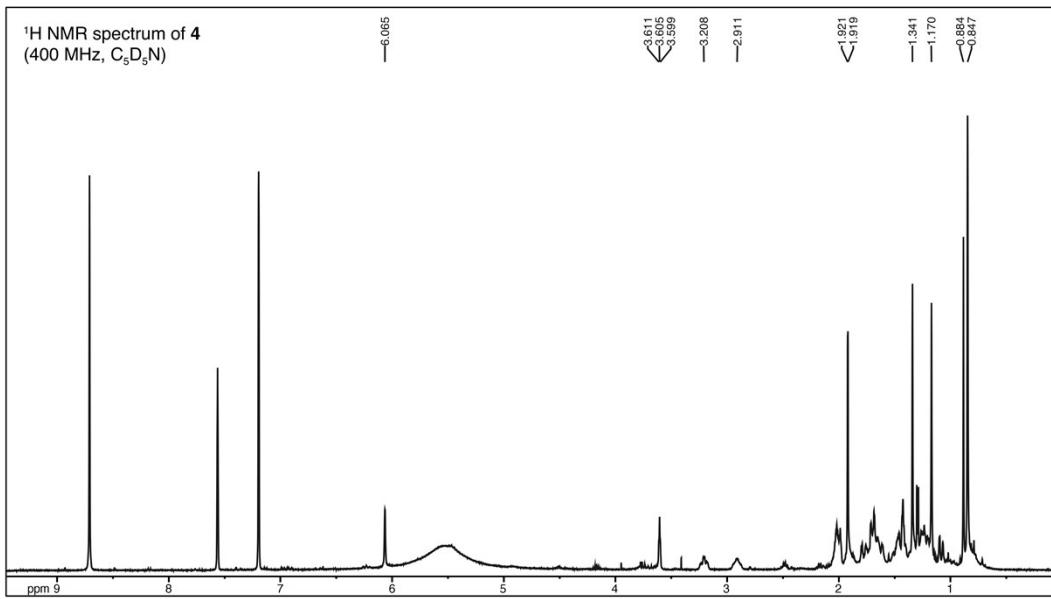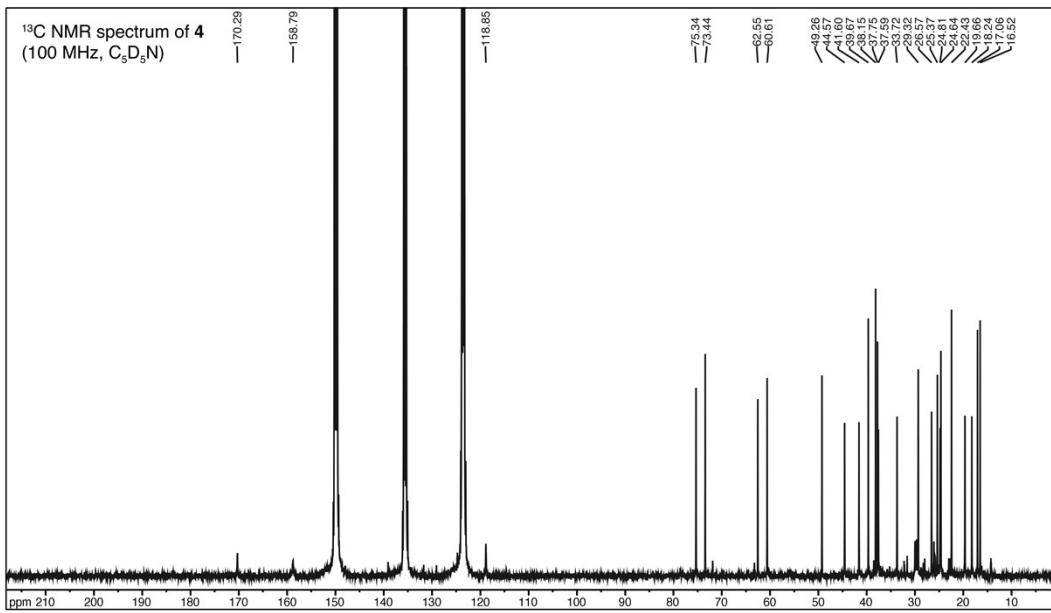

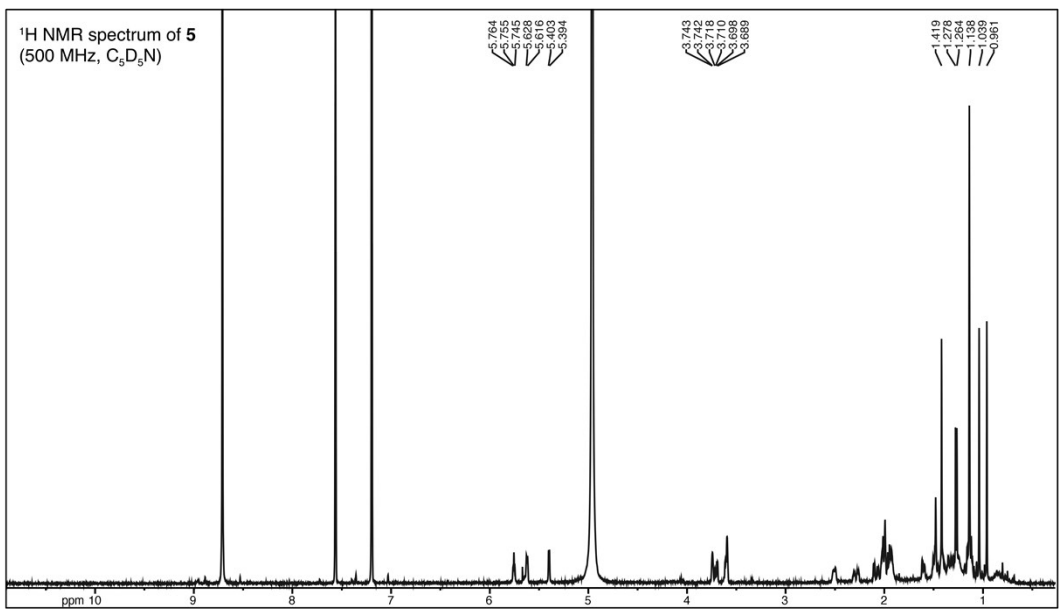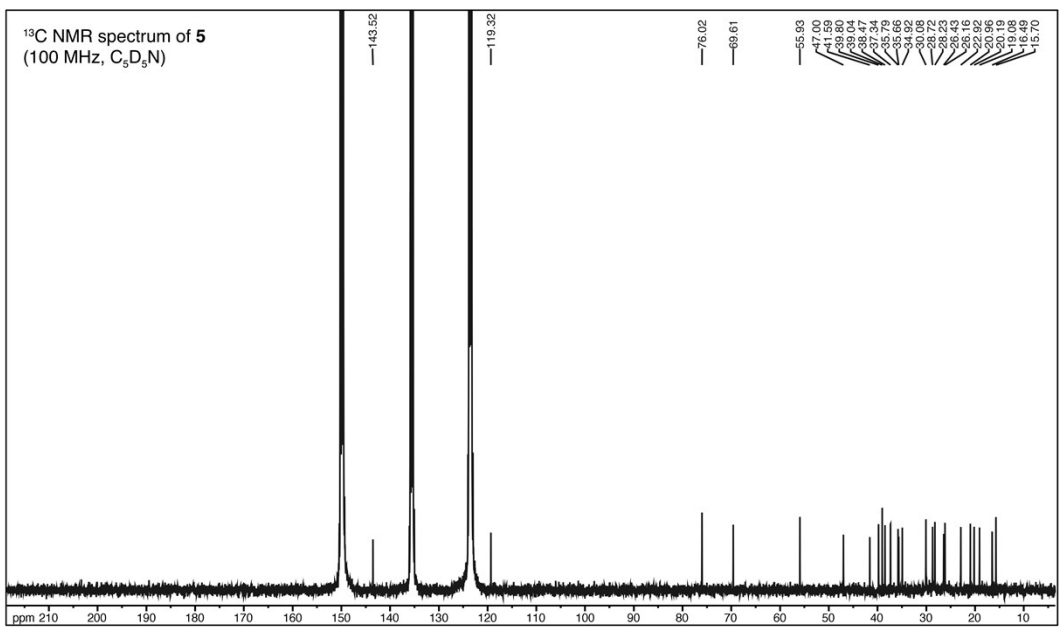

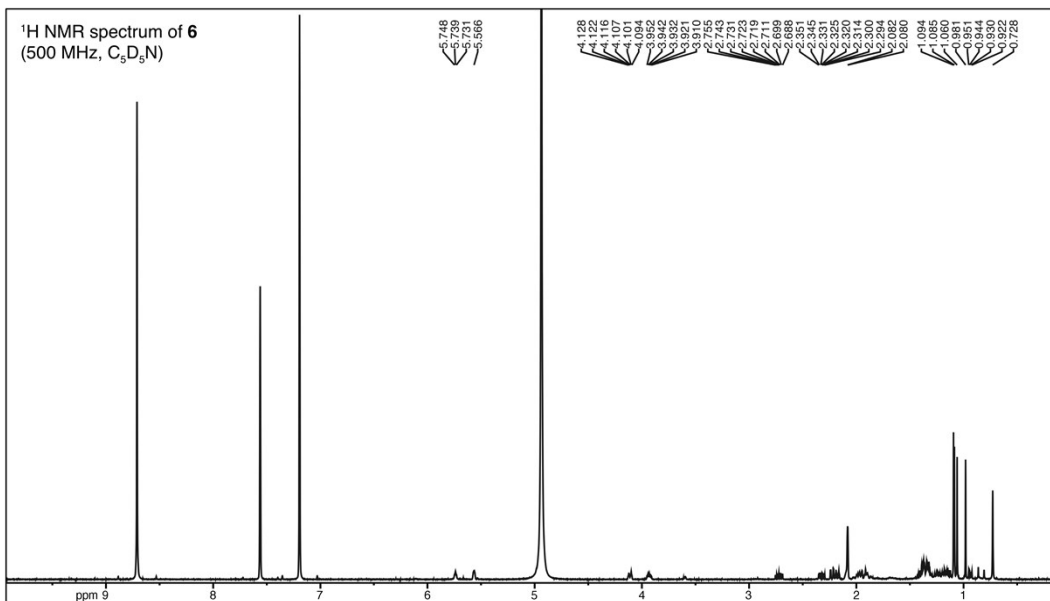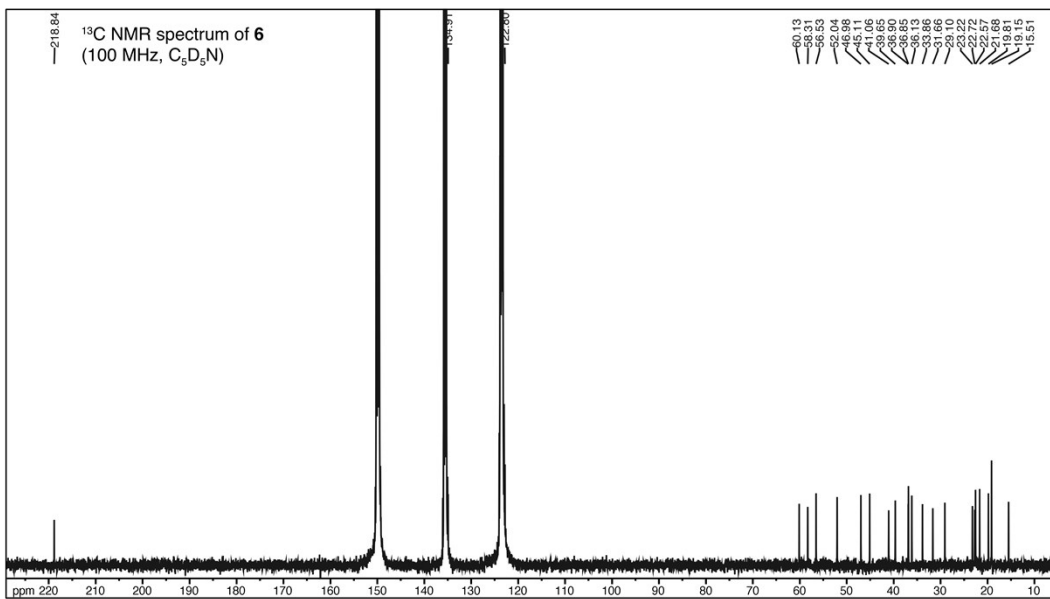

## Computational Methodology

Quantum mechanical calculations were performed using the Gaussian 09 software.<sup>[8]</sup> Computations were carried out to investigate the conformational preferences of C3-*epi*-**5**, to predict the NMR shifts of diastereomers of **5**, to predict the specific rotation of **5**, and to examine carbocation reactivities in the proposed biosynthetic routes to **5** and **6**. For each of these applications, combinations of functionals and basis sets were selected on the basis of literature precedent. Specific details of methodology for each application are provided below, along with the computational data.

### Preferred Conformation of the C3-□ Epimer of **5**

During the assignment of the relative stereochemistry of **5**, the observation of NOESY cross-peaks between H-3 and both H<sub>3</sub>-24 and H<sub>3</sub>-25 was used as a diagnostic of the C-3 stereochemistry. If the C3 stereochemistry of **5** was □, then the observation of NOESY cross-peaks between H-3 and both H<sub>3</sub>-24 and H<sub>3</sub>-25 would require a significant fraction of molecules to have a boat-like conformation of the A ring. Density functional theory calculations were therefore performed to determine the conformational preferences of C3-*epi*-**5**. Geometry optimizations were conducted at the B3LYP<sup>[9]</sup>/6-31G(d,p) level of theory in pyridine, as modeled by the PCM<sup>[10]</sup> implicit solvent model. Different combinations of chair and boat-like conformations of the A and D rings were explored. The global minimum was found to have the A and D rings both in chair conformations. A conformer having an A-ring chair and a D-ring boat lay 1.2 kcal/mol higher in energy. Conformers in which the A ring adopted a boat-like conformation, with the D ring in either a chair or boat-like conformation, lay at least 3.8 kcal/mol higher than the global minimum. Therefore, A-ring boat conformers would not be expected to contribute significantly to the conformer distribution of C3-*epi*-**5** at room temperature (0.1%), and a NOESY cross-peak between H-3 and H<sub>3</sub>-24 (which are *trans*-diaxial in the A-ring chair conformer) would not be expected to be observed.

Optimized geometries of conformers of C3-epi-5 at the  $PCM_{\text{pyridine}}/B3LYP/6-31G(d,p)$  level of theory

Gibbs free energies (G) for these species are corrected to a standard state of 1 mol/L (25 °C).

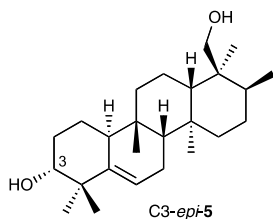

A ring chair, D ring chair (global minimum)

|   |           |           |           |
|---|-----------|-----------|-----------|
| C | 3.466387  | 0.133999  | -0.984116 |
| C | 2.200096  | 0.415821  | -0.106483 |
| C | 1.282493  | -0.810365 | 0.239033  |
| C | 2.196204  | -1.926893 | 0.819095  |
| C | 3.401180  | -2.260129 | -0.072779 |
| C | 4.301297  | -1.041252 | -0.362775 |
| C | 1.353213  | 1.615369  | -0.564174 |
| C | 0.441552  | 2.081034  | 0.576317  |
| C | -0.504699 | 0.994881  | 1.145670  |
| C | 0.305641  | -0.326548 | 1.386541  |
| C | -1.737294 | 0.783142  | 0.190294  |
| C | -2.484124 | -0.531627 | 0.420742  |
| C | -1.985172 | -1.473415 | 1.233280  |
| C | -0.650452 | -1.412448 | 1.926139  |
| C | -3.768892 | -0.774845 | -0.403625 |
| C | -4.665467 | 0.492124  | -0.358391 |
| C | -3.910440 | 1.770260  | -0.713768 |
| C | -2.731945 | 1.970821  | 0.238850  |
| O | -5.780701 | 0.284078  | -1.233541 |
| C | -3.366920 | -1.097519 | -1.867256 |
| C | -4.603913 | -1.957053 | 0.126681  |
| C | -0.992624 | 1.493387  | 2.530979  |
| C | 0.521128  | -1.399544 | -0.970097 |
| C | 5.130178  | -0.683089 | 0.886625  |
| C | 4.332577  | 1.417155  | -1.085030 |
| O | 4.433111  | 2.105207  | 0.161034  |
| C | 3.155942  | -0.208122 | -2.463026 |
| H | -1.353787 | 0.765057  | -0.839444 |
| H | -2.216796 | 2.906711  | 0.000769  |
| H | -3.129414 | 2.080949  | 1.253758  |
| H | -3.572794 | 1.723304  | -1.755997 |
| H | -4.597244 | 2.624477  | -0.644053 |
| H | -5.029061 | 0.591009  | 0.679035  |
| H | -6.358736 | 1.054254  | -1.147914 |
| H | -2.786766 | -2.024625 | -1.895211 |
| H | -2.756570 | -0.311608 | -2.320082 |
| H | -4.258906 | -1.226160 | -2.485717 |
| H | -4.080566 | -2.910092 | 0.007279  |
| H | -5.540586 | -2.015812 | -0.431823 |
| H | -4.845579 | -1.831348 | 1.187550  |
| H | -2.544344 | -2.390460 | 1.397768  |
| H | -0.185636 | -2.402805 | 1.864995  |
| H | -0.808908 | -1.253229 | 3.002937  |
| H | 0.992983  | -0.081574 | 2.208243  |
| H | -0.169236 | 1.470209  | 3.252867  |
| H | -1.808705 | 0.883240  | 2.928477  |
| H | -1.346628 | 2.527146  | 2.479362  |
| H | 1.185009  | -1.953274 | -1.635202 |
| H | 0.022419  | -0.641504 | -1.576241 |

|   |           |           |           |
|---|-----------|-----------|-----------|
| H | -0.245905 | -2.098966 | -0.630610 |
| H | 2.620409  | 0.720782  | 0.860613  |
| H | 0.763758  | 1.370132  | -1.455562 |
| H | 1.998249  | 2.452765  | -0.844907 |
| H | -0.139766 | 2.956531  | 0.264072  |
| H | 1.086679  | 2.428736  | 1.395238  |
| H | 1.618671  | -2.844491 | 0.979356  |
| H | 2.554044  | -1.615594 | 1.809158  |
| H | 3.053433  | -2.701227 | -1.013488 |
| H | 4.001290  | -3.040800 | 0.411715  |
| H | 5.024232  | -1.342888 | -1.135393 |
| H | 5.700833  | -1.562958 | 1.206064  |
| H | 4.507508  | -0.370369 | 1.729693  |
| H | 5.835129  | 0.127110  | 0.693502  |
| H | 3.899200  | 2.083409  | -1.844752 |
| H | 5.329695  | 1.125054  | -1.450765 |
| H | 4.976297  | 2.890414  | 0.012777  |
| H | 2.790065  | -1.225575 | -2.598251 |
| H | 4.068431  | -0.114423 | -3.064818 |
| H | 2.412634  | 0.473341  | -2.887301 |

0 imaginary frequencies  
E = -1128.442515  
G = -1127.858939

#### A ring chair, D ring boat ( $G_{\text{rel}} = 1.2$ kcal/mol)

|   |           |           |           |
|---|-----------|-----------|-----------|
| C | 3.366294  | 0.160165  | -0.953439 |
| C | 2.133787  | 0.550699  | -0.050152 |
| C | 1.265789  | -0.629730 | 0.502293  |
| C | 2.198598  | -1.595928 | 1.318670  |
| C | 3.698422  | -1.471829 | 0.994311  |
| C | 3.965117  | -1.221683 | -0.497672 |
| C | 1.246778  | 1.649894  | -0.662164 |
| C | 0.303359  | 2.241138  | 0.388788  |
| C | -0.634710 | 1.209749  | 1.058560  |
| C | 0.218627  | -0.018522 | 1.516908  |
| C | -1.801529 | 0.806525  | 0.087794  |
| C | -2.503622 | -0.497839 | 0.472712  |
| C | -2.002224 | -1.292786 | 1.428871  |
| C | -0.708831 | -1.068080 | 2.165969  |
| C | -3.734214 | -0.919079 | -0.361454 |
| C | -4.677540 | 0.299286  | -0.560710 |
| C | -3.949688 | 1.543111  | -1.066346 |
| C | -2.842331 | 1.939231  | -0.090584 |
| C | -3.242418 | -1.448439 | -1.734838 |
| C | -4.554879 | -2.038134 | 0.309999  |
| O | -5.729412 | -0.088976 | -1.452153 |
| C | -1.212473 | 1.872591  | 2.336179  |
| C | 0.594978  | -1.457831 | -0.617943 |
| C | 5.452929  | -1.415937 | -0.830953 |
| C | 4.413573  | 1.292512  | -0.838852 |
| O | 4.895958  | 1.421754  | 0.500744  |
| C | 3.019497  | 0.077321  | -2.458374 |
| H | -1.361543 | 0.657458  | -0.908104 |
| H | -2.350800 | 2.853620  | -0.437597 |
| H | -3.304678 | 2.177375  | 0.873790  |
| H | -3.542754 | 1.353279  | -2.066943 |
| H | -4.671049 | 2.364690  | -1.170341 |
| H | -5.106699 | 0.537621  | 0.427869  |
| H | -6.346638 | 0.653039  | -1.505390 |
| H | -2.633282 | -2.345174 | -1.587732 |
| H | -2.630822 | -0.718274 | -2.271430 |
| H | -4.093175 | -1.705296 | -2.370996 |
| H | -3.995832 | -2.976747 | 0.364026  |

|   |           |           |           |
|---|-----------|-----------|-----------|
| H | -5.461259 | -2.221186 | -0.271430 |
| H | -4.851125 | -1.759176 | 1.326948  |
| H | -2.528489 | -2.204780 | 1.697791  |
| H | -0.192228 | -2.030294 | 2.262963  |
| H | -0.930734 | -0.770019 | 3.201165  |
| H | 0.856811  | 0.379461  | 2.317848  |
| H | -0.428557 | 1.978927  | 3.093957  |
| H | -2.028023 | 1.289316  | 2.773023  |
| H | -1.595750 | 2.875801  | 2.127485  |
| H | 1.338049  | -2.015724 | -1.192373 |
| H | 0.023683  | -0.849233 | -1.321804 |
| H | -0.092179 | -2.192838 | -0.191656 |
| H | 2.587660  | 1.001316  | 0.842968  |
| H | 0.677027  | 1.261078  | -1.514087 |
| H | 1.865746  | 2.459670  | -1.065113 |
| H | -0.283490 | 3.058733  | -0.046185 |
| H | 0.917097  | 2.700122  | 1.176800  |
| H | 1.880771  | -2.630035 | 1.138460  |
| H | 2.065882  | -1.426704 | 2.393590  |
| H | 4.207673  | -2.391437 | 1.310066  |
| H | 4.149483  | -0.657154 | 1.569042  |
| H | 3.422211  | -1.996834 | -1.056442 |
| H | 5.754852  | -2.442537 | -0.595798 |
| H | 6.081705  | -0.738639 | -0.245529 |
| H | 5.667631  | -1.250251 | -1.892180 |
| H | 3.959103  | 2.237525  | -1.168387 |
| H | 5.245485  | 1.084784  | -1.525711 |
| H | 5.498591  | 2.176658  | 0.520858  |
| H | 2.200158  | -0.618068 | -2.648571 |
| H | 3.886470  | -0.270889 | -3.030347 |
| H | 2.730918  | 1.050137  | -2.868681 |

0 imaginary frequencies  
E = -1128.441905  
G = -1127.856975

### A ring boat, D ring chair ( $G_{\text{rel}} = 5.8$ kcal/mol)

|   |           |           |           |
|---|-----------|-----------|-----------|
| C | -3.542351 | 0.168162  | 0.912858  |
| C | -2.224408 | 0.418338  | 0.106676  |
| C | -1.325206 | -0.831084 | -0.198949 |
| C | -2.239521 | -1.913572 | -0.841270 |
| C | -3.501637 | -2.217319 | -0.021432 |
| C | -4.378637 | -0.974376 | 0.234866  |
| C | -1.369878 | 1.590453  | 0.618043  |
| C | -0.383071 | 2.034469  | -0.466421 |
| C | 0.564977  | 0.926305  | -0.986415 |
| C | -0.270217 | -0.369053 | -1.287411 |
| C | 1.715019  | 0.650348  | 0.045605  |
| C | 2.498494  | -0.627342 | -0.261272 |
| C | 2.004305  | -1.561358 | -1.084362 |
| C | 0.671806  | -1.492237 | -1.780360 |
| C | 3.839229  | -0.785115 | 0.468671  |
| C | 4.794222  | 0.396838  | 0.045108  |
| C | 4.036390  | 1.639859  | -0.456572 |
| C | 2.691318  | 1.855520  | 0.242030  |
| O | 5.748950  | 0.719190  | 1.065283  |
| C | 3.576067  | -0.778784 | 1.999003  |
| C | 4.565769  | -2.103503 | 0.148566  |
| C | 1.161013  | 1.421124  | -2.327401 |
| C | -0.647710 | -1.454066 | 1.046683  |
| C | -5.128810 | -0.578617 | -1.052497 |
| C | -4.374013 | 1.475644  | 0.984412  |
| O | -4.390813 | 2.178959  | -0.257312 |
| C | -3.317602 | -0.199805 | 2.400415  |



|   |           |           |           |
|---|-----------|-----------|-----------|
| H | 1.229156  | 0.497315  | 1.015179  |
| H | 2.861100  | 2.022756  | 1.312455  |
| H | 2.238911  | 2.782069  | -0.120957 |
| H | 4.689915  | 2.510706  | -0.331196 |
| H | 3.865902  | 1.531953  | -1.533136 |
| H | 5.417937  | 0.030906  | -0.777384 |
| H | 5.273414  | 1.144566  | 1.792133  |
| H | 2.908873  | -1.606983 | 2.257022  |
| H | 3.105771  | 0.140799  | 2.357631  |
| H | 4.511989  | -0.914417 | 2.547076  |
| H | 3.999660  | -2.975791 | 0.490580  |
| H | 5.535889  | -2.109787 | 0.655782  |
| H | 4.750217  | -2.214763 | -0.924684 |
| H | 2.581284  | -2.460418 | -1.285725 |
| H | 0.184065  | -2.469690 | -1.695942 |
| H | 0.847491  | -1.370976 | -2.859648 |
| H | -0.901558 | -0.095613 | -2.144408 |
| H | 0.371284  | 1.516131  | -3.080957 |
| H | 1.920630  | 0.740081  | -2.719630 |
| H | 1.621903  | 2.407763  | -2.218000 |
| H | -1.335295 | -2.091011 | 1.605973  |
| H | -0.268885 | -0.708306 | 1.748190  |
| H | 0.195126  | -2.082977 | 0.750732  |
| H | -2.583253 | 0.740200  | -0.879629 |
| H | -0.839527 | 1.324550  | 1.540134  |
| H | -2.005079 | 2.445229  | 0.866992  |
| H | 0.200213  | 2.894355  | -0.116638 |
| H | -0.971089 | 2.402211  | -1.318671 |
| H | -1.683677 | -2.847835 | -0.979873 |
| H | -2.532394 | -1.581430 | -1.845724 |
| H | -3.221144 | -2.679466 | 0.931500  |
| H | -4.097480 | -2.973587 | -0.548103 |
| H | -5.150672 | -1.261413 | 0.964360  |
| H | -5.712207 | -1.435864 | -1.408263 |
| H | -4.452325 | -0.283271 | -1.859549 |
| H | -5.813867 | 0.254912  | -0.889505 |
| H | -3.960772 | 2.121309  | 1.772507  |
| H | -5.396469 | 1.209537  | 1.295815  |
| H | -4.921215 | 2.976248  | -0.128489 |
| H | -2.970284 | -1.223115 | 2.539493  |
| H | -4.260605 | -0.103842 | 2.952713  |
| H | -2.591306 | 0.466799  | 2.874632  |

0 imaginary frequencies  
E = -1128.434474  
G = -1127.849748

#### A ring boat, D ring boat ( $G_{\text{rel}} = 3.8$ kcal/mol)

|   |           |           |           |
|---|-----------|-----------|-----------|
| C | -3.297824 | 0.276039  | 0.850394  |
| C | -2.050064 | 0.545815  | -0.078085 |
| C | -1.174803 | -0.696443 | -0.450867 |
| C | -2.096072 | -1.760668 | -1.151268 |
| C | -3.600599 | -1.603307 | -0.863174 |
| C | -3.887045 | -1.156802 | 0.577522  |
| C | -1.173603 | 1.717126  | 0.397759  |
| C | -0.207065 | 2.161618  | -0.703045 |
| C | 0.745136  | 1.049970  | -1.204121 |
| C | -0.103503 | -0.229091 | -1.517425 |
| C | 1.871878  | 0.764226  | -0.156623 |
| C | 2.606825  | -0.551548 | -0.398909 |
| C | 2.118660  | -1.477589 | -1.234188 |
| C | 0.824119  | -1.368808 | -1.995060 |
| C | 3.941894  | -0.769764 | 0.351040  |
| C | 4.028563  | 0.198788  | 1.554290  |

|   |           |           |           |
|---|-----------|-----------|-----------|
| C | 3.880641  | 1.677885  | 1.149340  |
| C | 2.907700  | 1.906952  | -0.027416 |
| C | 4.076847  | -2.214917 | 0.878240  |
| C | 5.140628  | -0.497566 | -0.592818 |
| O | 3.004722  | -0.187304 | 2.486692  |
| C | 1.372220  | 1.538658  | -2.533159 |
| C | -0.531628 | -1.372453 | 0.783288  |
| C | -5.378423 | -1.309629 | 0.916145  |
| C | -4.344490 | 1.378924  | 0.566404  |
| O | -4.804185 | 1.324539  | -0.786292 |
| C | -2.974910 | 0.400084  | 2.357782  |
| H | 1.401482  | 0.681568  | 0.829424  |
| H | 2.403579  | 2.869172  | 0.102723  |
| H | 3.476180  | 1.986917  | -0.959189 |
| H | 3.545626  | 2.230796  | 2.036163  |
| H | 4.866268  | 2.086057  | 0.899537  |
| H | 5.011959  | 0.056917  | 2.029695  |
| H | 3.059612  | 0.416804  | 3.239393  |
| H | 4.130064  | -2.936662 | 0.058587  |
| H | 3.236774  | -2.480721 | 1.521673  |
| H | 4.999852  | -2.315963 | 1.461422  |
| H | 5.129931  | -1.210878 | -1.422148 |
| H | 6.090492  | -0.616613 | -0.057816 |
| H | 5.119867  | 0.506896  | -1.022580 |
| H | 2.676464  | -2.398225 | -1.397526 |
| H | 0.302569  | -2.332048 | -1.945913 |
| H | 1.051028  | -1.233493 | -3.063211 |
| H | -0.721353 | 0.059258  | -2.379429 |
| H | 0.612663  | 1.578968  | -3.321862 |
| H | 2.180074  | 0.884799  | -2.874371 |
| H | 1.783683  | 2.547293  | -2.428547 |
| H | -1.288761 | -1.865760 | 1.396732  |
| H | 0.012982  | -0.679769 | 1.427647  |
| H | 0.176137  | -2.144001 | 0.470541  |
| H | -2.486400 | 0.871472  | -1.031934 |
| H | -0.619542 | 1.445431  | 1.303304  |
| H | -1.798049 | 2.573746  | 0.676714  |
| H | 0.371735  | 3.030825  | -0.369102 |
| H | -0.800832 | 2.509481  | -1.560254 |
| H | -1.777272 | -2.762837 | -0.840013 |
| H | -1.951192 | -1.726157 | -2.237369 |
| H | -4.102152 | -2.560052 | -1.058601 |
| H | -4.048635 | -0.874980 | -1.546050 |
| H | -3.350217 | -1.847127 | 1.242867  |
| H | -5.673936 | -2.360756 | 0.825609  |
| H | -6.002128 | -0.725524 | 0.233029  |
| H | -5.605933 | -0.995218 | 1.940221  |
| H | -3.896400 | 2.361094  | 0.773576  |
| H | -5.187896 | 1.262118  | 1.260752  |
| H | -5.400559 | 2.072636  | -0.920986 |
| H | -2.158848 | -0.261343 | 2.654409  |
| H | -3.851039 | 0.132428  | 2.958694  |
| H | -2.692668 | 1.420577  | 2.634713  |

0 imaginary frequencies  
E = -1128.436962  
G = -1127.852820

## General Notes on NMR Shift Calculations

NMR chemical shifts were computed by means of  $\text{PCM}_{\text{pyridine}}/\text{mPW1PW91}^{[11]}/6\text{-}311+\text{G}(2\text{d},\text{p})^{[12]}$  single-point calculations on  $\text{PCM}_{\text{pyridine}}/\text{B3LYP}/6\text{-}31\text{G}(\text{d},\text{p})$  geometries to best match NMR experiments (which were performed in pyridine- $\text{d}_5$ ). The computed chemical shifts were scaled using the training set in accordance with Tantillo's method.<sup>[13]</sup> The scaling factors are shown below.

**Table S2. Scaling factors for the present level of theory.**

$$\delta = \frac{b - \sigma}{-m}$$

|          | <sup>1</sup> H | <sup>13</sup> C |
|----------|----------------|-----------------|
| <i>m</i> | -1.0858        | -1.0582         |
| <i>b</i> | 31.8360        | 185.4211        |

**Table S3. Comparison of Computed NMR shifts for Each Diastereomer of 5.**

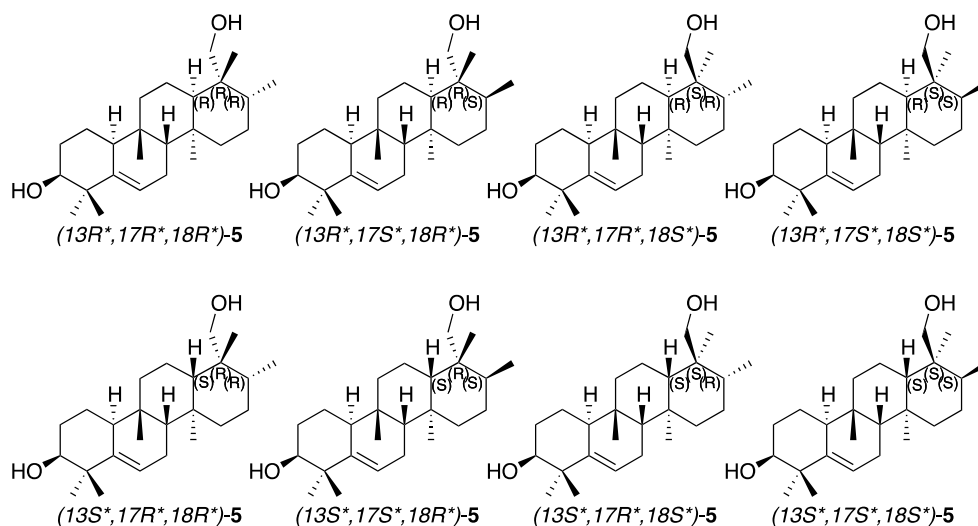

| Compound                         | <sup>1</sup> H    |                         |                  | <sup>13</sup> C   |                         |                  | Probability <sup>c</sup><br>(%) |
|----------------------------------|-------------------|-------------------------|------------------|-------------------|-------------------------|------------------|---------------------------------|
|                                  | CMAD <sup>a</sup> | Largest deviation (ppm) | R <sup>2,b</sup> | CMAD <sup>a</sup> | Largest deviation (ppm) | R <sup>2,b</sup> |                                 |
| 13R*,17R*,18R*                   | 0.31              | 0.97                    | 0.881            | 3.9               | 11.0                    | 0.973            | 0.00                            |
| 13R*,17S*,18R*                   | 0.34              | 0.94                    | 0.861            | 3.6               | 14.8                    | 0.971            | 0.00                            |
| 13R*,17R*,18S*                   | 0.32              | 1.13                    | 0.876            | 3.3               | 10.3                    | 0.975            | 0.00                            |
| 13R*,17S*,18S*                   | 0.35              | 0.91                    | 0.851            | 3.7               | 14.9                    | 0.969            | 0.00                            |
| 13S*,17R*,18R <sup>d</sup>       | 0.24              | 0.70                    | 0.946            | 2.7               | 10.0                    | 0.986            | 0.00                            |
| 13S*,17S*,18R <sup>d</sup>       | 0.19              | 0.66                    | 0.969            | 2.1               | 5.1                     | 0.994            | 0.02                            |
| 13S*,17R*,18S <sup>d</sup>       | 0.27              | 0.69                    | 0.929            | 2.2               | 8.9                     | 0.992            | 0.00                            |
| <b>13S*,17S*,18S<sup>d</sup></b> | <b>0.21</b>       | <b>0.52</b>             | <b>0.972</b>     | <b>1.8</b>        | <b>5.8</b>              | <b>0.996</b>     | <b>99.8</b>                     |

<sup>a</sup>CMAD = Computed Mean Absolute Deviation;  $(1/n)\sum|\delta_{\text{comp}}-\delta_{\text{exp}}|$ , where  $\delta_{\text{comp}}$  refers to the scaled computed chemical shifts.

<sup>b</sup>R<sup>2</sup> = linear regression coefficient between  $\delta_{\text{comp}}$  and  $\delta_{\text{exp}}$ .

<sup>c</sup>Computed with Goodman's DP4 function.<sup>[14]</sup>

<sup>d</sup>Weighted average of conformations < 2.0 kcal/mol.

The gross conformational change upon inversion of stereochemistry of C-13 was captured in the NMR calculations, resulting in poor fit for all  $13R^*$  diastereomers (i.e. those corresponding to a *cis* C/D ring junction). Our efforts turned to further distinguish between the  $13S^*$  diastereomers by computing the weighted averages of the lowest energy conformers (<2 kcal/mol). Below is an example. Contribution percentages were calculated with the following equations:

$$K_{eq,i} = e^{-\frac{\Delta G_i}{RT}}, \text{ for } i \text{ conformer}$$

$$\% \text{ contribution of } i = \frac{K_{eq,i}}{\Sigma(K_{eq,n})} \times 100$$

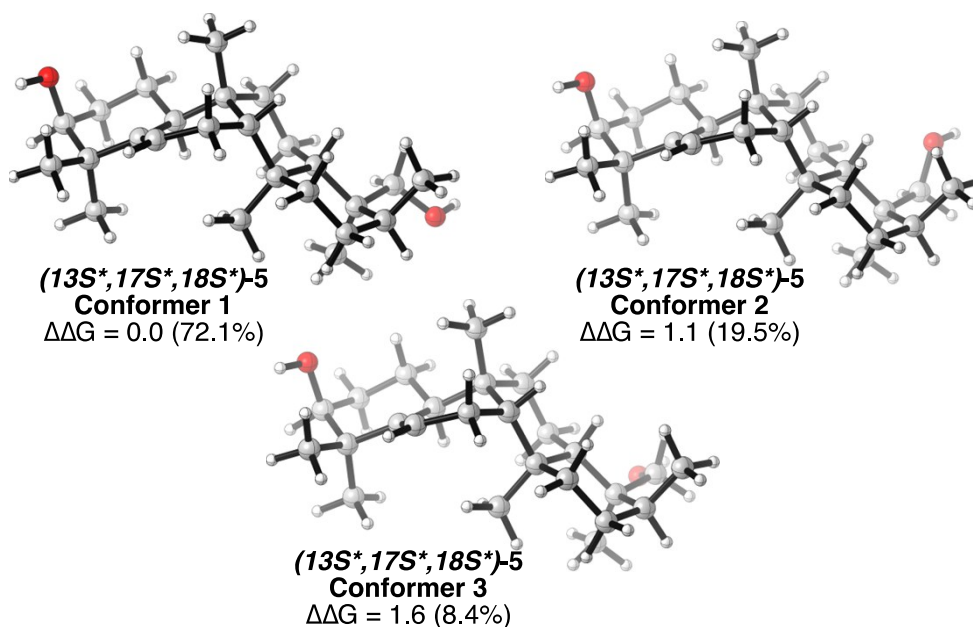

**Table S4. Comparison of Weighted Average Computed NMR shifts for (13S\*,17S\*,18S\*)-5.**

| Compound       | <sup>1</sup> H    |                         |                | <sup>13</sup> C   |                         |                | $\Delta E$<br>(kcal/mol) |
|----------------|-------------------|-------------------------|----------------|-------------------|-------------------------|----------------|--------------------------|
|                | CMAD <sup>a</sup> | Largest deviation (ppm) | R <sup>2</sup> | CMAD <sup>a</sup> | Largest deviation (ppm) | R <sup>2</sup> |                          |
| SSS-1          | 0.21              | 0.45                    | 0.970          | 1.8               | 5.8                     | 0.996          | 0.0                      |
| SSS-2          | 0.19              | 0.40                    | 0.957          | 1.8               | 6.0                     | 0.995          | 1.1                      |
| SSS-3          | 0.22              | 0.43                    | 0.935          | 2.1               | 1.8                     | 0.994          | 1.6                      |
| <b>SSS-Avg</b> | <b>0.21</b>       | <b>0.44</b>             | <b>0.972</b>   | <b>1.8</b>        | <b>5.8</b>              | <b>0.996</b>   | –                        |

**Table S5. Computed Chemical Shifts for (13*S*\*,17*S*\*,18*S*\*)-5<sup>a</sup>**

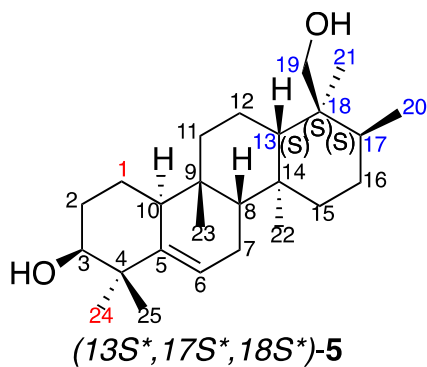

| Position  | <sup>1</sup> H [ $\delta$ , mult, <i>J</i> (Hz)] |                       |             | <sup>13</sup> C |                       |            |
|-----------|--------------------------------------------------|-----------------------|-------------|-----------------|-----------------------|------------|
|           | Experimental                                     | Computed <sup>b</sup> | Abs. Diff.  | Experimental    | Computed <sup>b</sup> | Abs. Diff. |
| <b>1a</b> | 2.00 m <sup>c</sup>                              | 1.56                  | <b>0.44</b> | 21.0            | 21.4                  | 0.4        |
| 1b        | 1.60 m                                           | 1.48                  | 0.12        |                 |                       |            |
| 2a        | 1.91-2.04 m <sup>c</sup>                         | 1.77                  | ambiguous   | 30.1            | 27.4                  | 2.7        |
| 2b        | 1.91-2.04 m <sup>c</sup>                         | 1.69                  | ambiguous   |                 |                       |            |
| 3         | 3.74 m                                           | 3.45                  | 0.29        | 76.0            | 75.3                  | 0.7        |
| 4         |                                                  |                       |             | 41.6            | 43.2                  | 1.6        |
| 5         |                                                  |                       |             | 143.5           | 143.0                 | 0.5        |
| 6         | 5.62 m                                           | 5.55                  | 0.17        | 119.3           | 119.8                 | 0.5        |
| 7a        | 2.29 m                                           | 2.20                  | 0.09        | 22.9            | 22.7                  | 0.2        |
| 7b        | 2.08 dd (19.0, 5.8)                              | 2.01                  | 0.07        |                 |                       |            |
| 8         | 1.13 m <sup>c</sup>                              | 1.08                  | 0.05        | 55.9            | 54.1                  | 1.8        |
| 9         |                                                  |                       |             | 35.8            | 39.6                  | 3.8        |
| 10        | 2.51 m                                           | 2.36                  | 0.15        | 37.3            | 37.1                  | 0.2        |
| 11a       | 2.01 m <sup>c</sup>                              | 1.92                  | 0.09        | 38.5            | 36.8                  | 1.7        |
| 11b       | 1.13 m <sup>c</sup>                              | 1.05                  | 0.08        |                 |                       |            |
| 12a       | 1.38-1.49 m <sup>c</sup>                         | 1.34                  | ambiguous   | 19.1            | 18.8                  | 0.3        |
| 12b       | 1.38-1.49 m <sup>c</sup>                         | 1.31                  | ambiguous   |                 |                       |            |
| <b>13</b> | <b>1.48 m<sup>c</sup></b>                        | <b>1.28</b>           | <b>0.20</b> | <b>47.0</b>     | <b>47.2</b>           | <b>0.2</b> |
| 14        |                                                  |                       |             | 39.0            | 39.6                  | 0.6        |
| 15a       | 1.49 m <sup>c</sup>                              | 1.55                  | 0.06        | 34.9            | 32.7                  | 2.2        |
| 15b       | 1.15 m <sup>c</sup>                              | 1.04                  | 0.11        |                 |                       |            |

|     |                     |      |      |      |      |     |
|-----|---------------------|------|------|------|------|-----|
| 16a | 1.99 m <sup>c</sup> | 1.95 | 0.04 | 26.2 | 24.7 | 1.5 |
| 16b | 1.34 m <sup>c</sup> | 1.24 | 0.10 |      |      |     |
| 17  | 1.93 m <sup>c</sup> | 1.55 | 0.38 | 35.7 | 35.9 | 0.2 |
| 18  |                     |      |      | 39.8 | 42.1 | 2.3 |
| 19a | 3.70 dd (10.2, 4.4) | 3.36 | 0.34 | 69.6 | 68.0 | 2.8 |
| 19b | 3.60 m              | 3.28 | 0.32 |      |      |     |
| 20  | 1.27 d (7.1)        | 0.97 | 0.34 | 15.7 | 12.9 | 2.8 |
| 21  | 1.14 s              | 1.00 | 0.14 | 20.2 | 16.9 | 3.3 |
| 22  | 1.04 s              | 0.89 | 0.15 | 16.5 | 13.1 | 3.3 |
| 23  | 0.96 s              | 0.87 | 0.09 | 28.7 | 26.3 | 2.4 |
| 24  | 1.14 s              | 1.03 | 0.11 | 28.2 | 22.4 | 5.8 |
| 25  | 1.42 s              | 1.00 | 0.42 | 26.4 | 25.0 | 1.4 |

<sup>a</sup>Colored values correlate with colored regions in the figure; blue is the region of interest and red are the regions with the largest deviation.

<sup>b</sup>Weighted average of three lowest energy conformers.

<sup>c</sup>Indicates overlapping signals.



Molecular geometries of diastereomers of compound 5 at the  $PCM_{\text{pyridine}}/B3LYP/6-31G(d,p)$  level of theory.

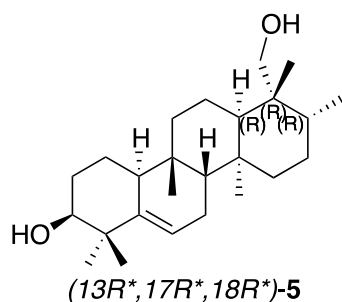

(13R\*,17R\*,18R\*)-5

|   |          |          |          |
|---|----------|----------|----------|
| C | -2.23102 | -0.79481 | 0.51501  |
| H | -2.49923 | -1.02991 | 1.55462  |
| C | -3.00213 | -1.81896 | -0.36402 |
| H | -2.70691 | -2.84494 | -0.13183 |
| H | -2.75514 | -1.65191 | -1.42085 |
| C | -4.52163 | -1.68864 | -0.16040 |
| H | -4.78377 | -2.01503 | 0.85351  |
| H | -5.05102 | -2.35625 | -0.84944 |
| C | -5.03595 | -0.25906 | -0.39025 |
| H | -6.10530 | -0.20867 | -0.14998 |
| O | -4.95213 | 0.07437  | -1.78179 |
| H | -4.02181 | 0.28706  | -1.95754 |
| C | -4.27515 | 0.79520  | 0.48399  |
| C | -4.59415 | 0.57990  | 1.98251  |
| H | -5.66937 | 0.69691  | 2.15637  |
| H | -4.07467 | 1.32965  | 2.58849  |
| H | -4.30680 | -0.40426 | 2.35662  |
| C | -4.77220 | 2.20533  | 0.11642  |
| H | -4.23124 | 2.97067  | 0.68193  |
| H | -5.83570 | 2.29651  | 0.36216  |
| H | -4.66396 | 2.41728  | -0.94852 |
| C | -2.78847 | 0.57528  | 0.17449  |
| C | -2.04922 | 1.43338  | -0.53919 |
| H | -2.45723 | 2.40021  | -0.82415 |
| C | -0.63665 | 1.19168  | -0.97959 |
| H | 0.00075  | 1.92111  | -0.46209 |
| H | -0.56912 | 1.47260  | -2.03566 |
| C | -0.06451 | -0.24674 | -0.79784 |

|   |          |          |          |
|---|----------|----------|----------|
| H | -0.39922 | -0.84121 | -1.66100 |
| C | -0.66236 | -0.90297 | 0.48955  |
| C | -0.34626 | -2.40909 | 0.67036  |
| H | 0.65440  | -2.59027 | 1.06104  |
| H | -0.44653 | -2.97367 | -0.26080 |
| H | -1.04188 | -2.84162 | 1.39884  |
| C | 1.51980  | -0.18301 | -0.90027 |
| C | 1.83386  | 0.64492  | -2.18167 |
| H | 1.12461  | 0.38400  | -2.97532 |
| H | 2.82484  | 0.42681  | -2.57831 |
| H | 1.78164  | 1.72232  | -2.01325 |
| C | 2.11880  | 0.47270  | 0.40292  |
| H | 1.85082  | 1.53421  | 0.38067  |
| C | 1.46809  | -0.10967 | 1.68797  |
| H | 1.78157  | 0.49137  | 2.54497  |
| H | 1.85060  | -1.11855 | 1.88356  |
| C | -0.06858 | -0.13487 | 1.69119  |
| H | -0.44860 | 0.89344  | 1.69665  |
| H | -0.41446 | -0.59172 | 2.62857  |
| C | 2.14777  | -1.58248 | -1.13234 |
| H | 1.79983  | -1.97338 | -2.09832 |
| H | 1.81139  | -2.29506 | -0.38227 |
| C | 3.68204  | -1.57787 | -1.09443 |
| H | 4.10097  | -1.04386 | -1.95622 |
| H | 4.03996  | -2.61094 | -1.19181 |
| C | 4.24507  | -0.98563 | 0.21062  |
| H | 3.86854  | -1.61514 | 1.03010  |
| C | 5.77854  | -1.11594 | 0.22577  |
| H | 6.22346  | -0.74505 | 1.15328  |
| H | 6.24348  | -0.57904 | -0.60830 |
| H | 6.06179  | -2.16959 | 0.12682  |
| C | 3.70184  | 0.45469  | 0.50371  |
| C | 4.34523  | 1.47808  | -0.46537 |
| H | 4.27109  | 1.15635  | -1.50777 |
| H | 5.41591  | 1.55194  | -0.22993 |

|                         |                |         |          |
|-------------------------|----------------|---------|----------|
| O                       | 3.72462        | 2.75639 | -0.29513 |
| H                       | 4.17949        | 3.37710 | -0.87912 |
| C                       | 4.14389        | 0.89296 | 1.92341  |
| H                       | 3.91621        | 0.13964 | 2.68156  |
| H                       | 3.65767        | 1.82953 | 2.21093  |
| H                       | 5.22317        | 1.06887 | 1.95170  |
| 0 Imaginary Frequencies |                |         |          |
| E =                     | -1128.43857861 |         |          |
| H =                     | -1127.776515   |         |          |
| G =                     | -1127.856213   |         |          |

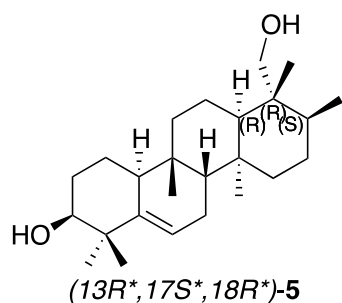

**(13R\*,17S\*,18R\*)-5**

|   |         |          |          |
|---|---------|----------|----------|
| C | 1.82848 | -0.77412 | -0.00087 |
| H | 1.54802 | -0.89812 | -1.05534 |
| C | 2.77174 | -1.96945 | 0.30986  |
| H | 2.25091 | -2.91658 | 0.13528  |
| H | 3.04833 | -1.96184 | 1.36896  |
| C | 4.06194 | -1.92950 | -0.51301 |
| H | 3.84673 | -2.05937 | -1.58003 |
| H | 4.71748 | -2.75761 | -0.22049 |
| C | 4.81124 | -0.61132 | -0.28700 |
| H | 5.71848 | -0.59133 | -0.90332 |
| O | 5.28603 | -0.53535 | 1.06642  |
| H | 4.53712 | -0.26072 | 1.61579  |
| C | 3.94236 | 0.62714  | -0.64804 |
| C | 3.67194 | 0.63981  | -2.17556 |
| H | 4.61867 | 0.62472  | -2.72771 |
| H | 3.13580 | 1.55258  | -2.45206 |
| H | 3.07648 | -0.20966 | -2.51614 |

|   |          |          |          |
|---|----------|----------|----------|
| C | 4.74737  | 1.90035  | -0.32428 |
| H | 4.21648  | 2.80080  | -0.64655 |
| H | 5.70291  | 1.87243  | -0.85900 |
| H | 4.96695  | 1.99024  | 0.74160  |
| C | 2.60126  | 0.54083  | 0.11064  |
| C | 2.09559  | 1.58292  | 0.78553  |
| H | 2.67737  | 2.49615  | 0.87708  |
| C | 0.72086  | 1.63706  | 1.39522  |
| H | 0.32033  | 2.64328  | 1.23788  |
| H | 0.80393  | 1.54975  | 2.48805  |
| C | -0.25704 | 0.55620  | 0.87558  |
| H | -1.01682 | 0.43195  | 1.65651  |
| C | 0.50049  | -0.81904 | 0.84243  |
| C | 0.81664  | -1.20266 | 2.31191  |
| H | -0.07175 | -1.06510 | 2.93742  |
| H | 1.62387  | -0.60085 | 2.73940  |
| H | 1.10835  | -2.25335 | 2.39421  |
| C | -1.08422 | 0.96868  | -0.40618 |
| C | -0.18017 | 1.36269  | -1.60130 |
| H | -0.80360 | 1.68454  | -2.44318 |
| H | 0.45442  | 0.55171  | -1.95869 |
| H | 0.47352  | 2.19832  | -1.33817 |
| C | -2.03844 | -0.19913 | -0.88597 |
| H | -2.27782 | 0.07867  | -1.92334 |
| C | -1.22486 | -1.51685 | -0.97952 |
| H | -0.52447 | -1.42520 | -1.81802 |
| H | -1.87681 | -2.35399 | -1.24947 |
| C | -0.44421 | -1.90613 | 0.28329  |
| H | 0.12833  | -2.81794 | 0.07466  |
| H | -1.14358 | -2.17774 | 1.07678  |
| C | -1.93255 | 2.23292  | -0.10644 |
| H | -2.27248 | 2.64248  | -1.06769 |
| H | -1.30726 | 3.01493  | 0.33502  |
| C | -3.16896 | 1.98386  | 0.74655  |
| H | -3.67770 | 2.93723  | 0.93890  |
| H | -2.90291 | 1.58097  | 1.73272  |
| C | -4.13300 | 1.03744  | 0.02366  |

|   |          |          |          |
|---|----------|----------|----------|
| H | -4.29930 | 1.47462  | -0.97378 |
| C | -5.49732 | 1.02653  | 0.73506  |
| H | -5.92153 | 2.03716  | 0.71944  |
| H | -5.40215 | 0.73531  | 1.78700  |
| H | -6.20187 | 0.34492  | 0.25772  |
| C | -3.48620 | -0.36924 | -0.23064 |
| C | -4.31072 | -1.10565 | -1.32512 |
| H | -3.73442 | -1.95561 | -1.71193 |
| H | -4.47235 | -0.41350 | -2.16630 |
| O | -5.56183 | -1.57980 | -0.82129 |
| H | -5.98867 | -2.07151 | -1.53508 |
| C | -3.52034 | -1.22344 | 1.05306  |
| H | -3.16148 | -2.23825 | 0.86584  |
| H | -4.54505 | -1.31912 | 1.41441  |
| H | -2.91760 | -0.79355 | 1.85743  |

0 Imaginary Frequencies

E = -1128.43651072

H = -1127.774701

G = -1127.854882

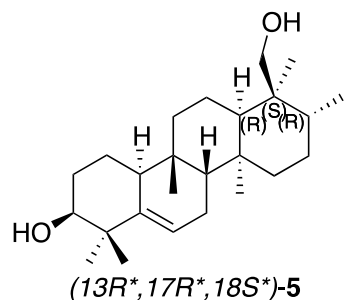

**(13R\*,17R\*,18S\*)-5**

|   |         |          |          |
|---|---------|----------|----------|
| C | 2.20216 | -0.40208 | -0.83704 |
| H | 2.42863 | -0.03585 | -1.84836 |
| C | 2.99564 | -1.72973 | -0.68056 |
| H | 2.67992 | -2.47206 | -1.41752 |
| H | 2.79366 | -2.16257 | 0.30799  |
| C | 4.50699 | -1.49116 | -0.84227 |
| H | 4.72354 | -1.21389 | -1.88120 |
| H | 5.05644 | -2.41868 | -0.64591 |

|   |          |          |          |
|---|----------|----------|----------|
| C | 5.04618  | -0.40664 | 0.10261  |
| H | 6.10568  | -0.22232 | -0.11498 |
| O | 5.02248  | -0.87823 | 1.45616  |
| H | 4.10285  | -0.80546 | 1.75712  |
| C | 4.26313  | 0.94340  | -0.03231 |
| C | 4.51863  | 1.57615  | -1.42084 |
| H | 4.20693  | 0.94515  | -2.25453 |
| H | 5.58672  | 1.78471  | -1.54662 |
| H | 3.98058  | 2.52616  | -1.50489 |
| C | 4.79077  | 1.93755  | 1.01833  |
| H | 4.72105  | 1.54314  | 2.03323  |
| H | 4.24210  | 2.88368  | 0.97245  |
| H | 5.84655  | 2.15307  | 0.82234  |
| C | 2.78722  | 0.57385  | 0.16750  |
| C | 2.08458  | 0.90459  | 1.25784  |
| H | 2.51336  | 1.56955  | 2.00387  |
| C | 0.68590  | 0.44891  | 1.54988  |
| H | 0.03897  | 1.33633  | 1.52912  |
| H | 0.65894  | 0.11549  | 2.59268  |
| C | 0.08993  | -0.66932 | 0.64236  |
| H | 0.44479  | -1.63303 | 1.03709  |
| C | 0.63517  | -0.52304 | -0.81646 |
| C | 0.29608  | -1.69658 | -1.76976 |
| H | 0.96238  | -1.66276 | -2.63958 |
| H | -0.71803 | -1.64385 | -2.16343 |
| H | 0.42006  | -2.67398 | -1.29511 |
| C | -1.48978 | -0.68466 | 0.81860  |
| C | -1.75159 | -0.68107 | 2.35212  |
| H | -1.63979 | 0.30648  | 2.80493  |
| H | -1.04773 | -1.36009 | 2.84711  |
| H | -2.74933 | -1.03905 | 2.60068  |
| C | -2.13157 | 0.55876  | 0.09231  |
| H | -1.85272 | 1.44887  | 0.66928  |
| C | -1.52765 | 0.77274  | -1.32280 |
| H | -1.86103 | 1.74438  | -1.69349 |
| H | -1.92608 | 0.02856  | -2.02219 |
| C | 0.00764  | 0.76600  | -1.39103 |

|   |          |          |          |
|---|----------|----------|----------|
| H | 0.39963  | 1.63717  | -0.85313 |
| H | 0.31632  | 0.89194  | -2.43780 |
| C | -2.12201 | -1.99761 | 0.28431  |
| H | -1.74380 | -2.84157 | 0.87691  |
| H | -1.81692 | -2.19053 | -0.74168 |
| C | -3.65588 | -1.99136 | 0.30606  |
| H | -4.04080 | -1.99805 | 1.33298  |
| H | -4.01883 | -2.92265 | -0.14723 |
| C | -4.26003 | -0.80414 | -0.46568 |
| H | -3.91650 | -0.89729 | -1.50699 |
| C | -5.79428 | -0.93079 | -0.48862 |
| H | -6.07832 | -1.90450 | -0.90247 |
| H | -6.27656 | -0.16551 | -1.10286 |
| H | -6.21941 | -0.86914 | 0.51878  |
| C | -3.71931 | 0.56932  | 0.05600  |
| C | -4.21459 | 1.68126  | -0.90944 |
| H | -5.31048 | 1.72490  | -0.87331 |
| H | -3.93868 | 1.45353  | -1.94186 |
| O | -3.67192 | 2.97592  | -0.63982 |
| H | -4.01664 | 3.26608  | 0.21506  |
| C | -4.31569 | 0.92605  | 1.44242  |
| H | -5.36407 | 1.22892  | 1.34617  |
| H | -3.77227 | 1.75901  | 1.90153  |
| H | -4.29114 | 0.10174  | 2.15380  |

0 Imaginary Frequencies

E = -1128.43987606

H = -1127.777869

G = -1127.857392

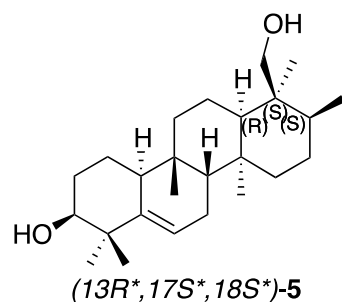

**(13R\*,17S\*,18S\*)-5**

|   |          |          |          |
|---|----------|----------|----------|
| C | 1.75401  | 0.71965  | 0.14793  |
| H | 1.51607  | 0.65646  | 1.21867  |
| C | 2.68664  | 1.95366  | 0.00980  |
| H | 2.17560  | 2.85418  | 0.36501  |
| H | 2.92014  | 2.12856  | -1.04523 |
| C | 4.01015  | 1.77874  | 0.75981  |
| H | 3.83997  | 1.72304  | 1.84135  |
| H | 4.65582  | 2.64710  | 0.58654  |
| C | 4.74507  | 0.52147  | 0.28055  |
| H | 5.67619  | 0.39847  | 0.84718  |
| O | 5.16405  | 0.68140  | -1.08424 |
| H | 4.39197  | 0.50171  | -1.64097 |
| C | 3.88733  | -0.76375 | 0.45611  |
| C | 3.67725  | -1.04445 | 1.96716  |
| H | 4.64467  | -1.13068 | 2.47529  |
| H | 3.14176  | -1.98949 | 2.09836  |
| H | 3.10427  | -0.26653 | 2.47562  |
| C | 4.67454  | -1.95812 | -0.11698 |
| H | 4.15478  | -2.90322 | 0.06528  |
| H | 5.65160  | -2.01966 | 0.37427  |
| H | 4.84953  | -1.85951 | -1.19036 |
| C | 2.51815  | -0.55172 | -0.22308 |
| C | 1.98375  | -1.46134 | -1.05013 |
| H | 2.55784  | -2.34340 | -1.32120 |
| C | 0.59036  | -1.40626 | -1.61449 |
| H | 0.19059  | -2.42491 | -1.63187 |
| H | 0.64018  | -1.11904 | -2.67474 |
| C | -0.36771 | -0.44093 | -0.87701 |
| H | -1.14961 | -0.18567 | -1.60193 |
| C | 0.38954  | 0.91070  | -0.61700 |
| C | 0.64312  | 1.56074  | -2.00334 |
| H | -0.27161 | 1.53149  | -2.60523 |
| H | 1.43160  | 1.05550  | -2.56945 |
| H | 0.92841  | 2.61206  | -1.90581 |
| C | -1.15795 | -1.07689 | 0.33287  |
| C | -0.21433 | -1.67614 | 1.40538  |

|   |          |          |          |
|---|----------|----------|----------|
| H | -0.80708 | -2.11886 | 2.21386  |
| H | 0.45811  | -0.94663 | 1.85604  |
| H | 0.40434  | -2.47055 | 0.97903  |
| C | -2.08862 | -0.01037 | 1.04392  |
| H | -2.32408 | -0.47491 | 2.01227  |
| C | -1.25793 | 1.25353  | 1.37238  |
| H | -0.53002 | 0.99031  | 2.14911  |
| H | -1.89486 | 2.02134  | 1.81936  |
| C | -0.52424 | 1.87287  | 0.17657  |
| H | 0.06698  | 2.72695  | 0.53057  |
| H | -1.26581 | 2.29869  | -0.50174 |
| C | -2.01971 | -2.27384 | -0.15595 |
| H | -2.29978 | -2.86357 | 0.72776  |
| H | -1.41926 | -2.94871 | -0.77332 |
| C | -3.31295 | -1.89903 | -0.87064 |
| H | -3.83728 | -2.81487 | -1.17224 |
| H | -3.11835 | -1.34538 | -1.79897 |
| C | -4.21087 | -1.08350 | 0.06721  |
| H | -4.27188 | -1.65308 | 1.00735  |
| C | -5.64607 | -1.00998 | -0.48576 |
| H | -6.07611 | -2.01730 | -0.50414 |
| H | -5.67816 | -0.63325 | -1.51348 |
| H | -6.30651 | -0.38490 | 0.12123  |
| C | -3.54561 | 0.28154  | 0.46338  |
| C | -3.62139 | 1.24688  | -0.74417 |
| H | -4.59792 | 1.12840  | -1.22834 |
| H | -2.85934 | 1.00058  | -1.49352 |
| O | -3.48584 | 2.60857  | -0.32002 |
| H | -3.56871 | 3.16099  | -1.10860 |
| C | -4.38333 | 0.89319  | 1.61372  |
| H | -5.38169 | 1.18033  | 1.27200  |
| H | -3.92203 | 1.79183  | 2.02447  |
| H | -4.50107 | 0.16649  | 2.42508  |

0 Imaginary Frequencies

E = -1128.43619626

H = -1127.774587

G = -1127.854445

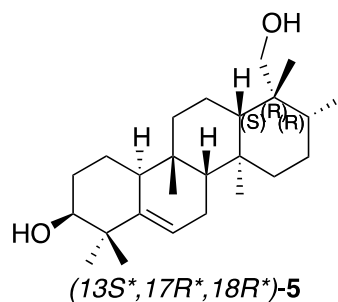

**(13S\*,17R\*,18R\*)-5 Conformer 1**

|   |          |          |          |
|---|----------|----------|----------|
| C | -1.78136 | -0.71585 | -0.23084 |
| H | -1.23506 | -0.95507 | 0.69156  |
| C | -2.85216 | -1.82783 | -0.38533 |
| H | -2.37021 | -2.80969 | -0.42508 |
| H | -3.37984 | -1.70641 | -1.33666 |
| C | -3.89589 | -1.80909 | 0.73448  |
| H | -3.43608 | -2.05370 | 1.69903  |
| H | -4.65966 | -2.57237 | 0.54681  |
| C | -4.58272 | -0.44140 | 0.81477  |
| H | -5.30726 | -0.43955 | 1.63827  |
| O | -5.36892 | -0.20892 | -0.36495 |
| H | -4.76148 | 0.08814  | -1.05814 |
| C | -3.56801 | 0.71229  | 1.05107  |
| C | -2.93348 | 0.55904  | 2.45880  |
| H | -3.71504 | 0.53481  | 3.22707  |
| H | -2.28184 | 1.41254  | 2.66848  |
| H | -2.33505 | -0.34793 | 2.56514  |
| C | -4.33709 | 2.04780  | 1.04829  |
| H | -5.13700 | 2.00813  | 1.79546  |
| H | -4.79755 | 2.25773  | 0.08048  |
| H | -3.68432 | 2.88505  | 1.31136  |
| C | -2.45459 | 0.64338  | -0.01699 |
| C | -2.03119 | 1.73525  | -0.67094 |
| H | -2.54170 | 2.68251  | -0.51942 |
| C | -0.82683 | 1.79737  | -1.57177 |
| H | -0.29230 | 2.73059  | -1.36294 |
| H | -1.15846 | 1.90215  | -2.61493 |

C 0.12063 0.58197 -1.45793  
 H 0.65783 0.51648 -2.41437  
 C -0.73566 -0.72729 -1.40590  
 C -1.46204 -0.85890 -2.76997  
 H -0.75744 -0.68389 -3.59009  
 H -2.28590 -0.14732 -2.87840  
 H -1.87170 -1.86373 -2.90674  
 C 1.29282 0.75143 -0.40395  
 C 0.77443 1.09536 1.01068  
 H -0.01698 1.84578 0.95958  
 H 1.56452 1.51363 1.63701  
 H 0.37403 0.22814 1.53868  
 C 2.16216 -0.55503 -0.45902  
 H 2.44947 -0.63072 -1.52178  
 C 1.28892 -1.79644 -0.19473  
 H 0.84469 -1.74834 0.80212  
 H 1.90161 -2.70151 -0.19738  
 C 0.21600 -1.93944 -1.27608  
 H -0.36421 -2.85559 -1.11312  
 H 0.72067 -2.07519 -2.24363  
 C 2.18598 1.92100 -0.89927  
 H 1.66386 2.87757 -0.78304  
 H 2.36494 1.79543 -1.97648  
 C 3.54090 2.00916 -0.19399  
 H 3.40862 2.29129 0.85835  
 H 4.12324 2.82365 -0.64362  
 C 4.35870 0.70929 -0.28430  
 H 4.51271 0.50366 -1.35492  
 C 5.75039 0.93862 0.33243  
 H 5.68642 1.26940 1.37485  
 H 6.27159 1.72673 -0.22183  
 H 6.38402 0.04814 0.30207  
 C 3.57005 -0.53563 0.26022  
 C 3.55017 -0.49277 1.80377  
 H 3.17880 0.47081 2.16925  
 H 4.58670 -0.58885 2.15677  
 O 2.76231 -1.56067 2.33570

H 2.86679 -1.54077 3.29597  
 C 4.33158 -1.81881 -0.15279  
 H 3.90003 -2.70585 0.31429  
 H 5.37875 -1.77279 0.15914  
 H 4.31236 -1.95726 -1.23951

0 Imaginary Frequencies

E = -1128.44396725  
 H = -1127.782447  
 G = -1127.863606  
 $\Delta G = 0.0$

**(13S\*,17R\*,18R\*)-5 Conformer 2**

C 1.86126 0.77404 0.00475  
 H 1.30932 0.77469 0.95471  
 C 2.94734 1.87247 0.15406  
 H 2.47912 2.84133 0.35452  
 H 3.49451 1.98473 -0.78729  
 C 3.96533 1.55322 1.25253  
 H 3.48618 1.55323 2.23852  
 H 4.74141 2.32650 1.27917  
 C 4.63462 0.19835 0.99577  
 H 5.33800 -0.02530 1.80712  
 O 5.44749 0.26151 -0.18682  
 H 4.85437 0.16536 -0.94635  
 C 3.60144 -0.96100 0.90768  
 C 2.93222 -1.16129 2.29321  
 H 3.69317 -1.35142 3.05885  
 H 2.26309 -2.02635 2.26173  
 H 2.34375 -0.30019 2.61644  
 C 4.35613 -2.26377 0.58008  
 H 5.13608 -2.43104 1.33073  
 H 4.84030 -2.22501 -0.39801  
 H 3.68779 -3.12940 0.60262  
 C 2.51879 -0.60142 -0.13296  
 C 2.11081 -1.47470 -1.06559  
 H 2.61223 -2.43452 -1.15585  
 C 0.93771 -1.27628 -1.98766

H 0.40114 -2.22765 -2.07098  
H 1.30362 -1.08067 -3.00594  
C -0.02027 -0.14156 -1.56401  
H -0.54070 0.18300 -2.47573  
C 0.82630 1.10575 -1.13312  
C 1.56398 1.61931 -2.39695  
H 2.39341 0.97024 -2.69293  
H 1.96854 2.62344 -2.24156  
H 0.86762 1.67940 -3.24022  
C -1.20764 -0.59596 -0.61907  
C -0.70488 -1.30575 0.65718  
H -1.52129 -1.77960 1.20425  
H -0.19743 -0.63426 1.35159  
H 0.00349 -2.09515 0.39646  
C -2.08462 0.67698 -0.34333  
H -2.33439 1.04726 -1.35083  
C -1.22692 1.78681 0.29421  
H -0.78631 1.44941 1.23946  
H -1.83858 2.65777 0.54454  
C -0.12830 2.23380 -0.67453  
H 0.44892 3.05658 -0.23682  
H -0.61476 2.65180 -1.56703  
C -2.08893 -1.59858 -1.41206  
H -1.55862 -2.54808 -1.54776  
H -2.26458 -1.19519 -2.41942  
C -3.44571 -1.87423 -0.75881  
H -3.31597 -2.40710 0.19231  
H -4.01556 -2.55903 -1.39979  
C -4.27778 -0.60187 -0.53521  
H -4.41875 -0.14328 -1.52710  
C -5.67263 -0.98119 -0.01053  
H -5.61795 -1.44866 0.97650  
H -6.14177 -1.69457 -0.69788  
H -6.33850 -0.11895 0.07400  
C -3.51099 0.47446 0.30954  
C -3.41862 0.09714 1.80693  
H -2.59012 0.64938 2.27173

H -3.20255 -0.97110 1.92498  
O -4.64287 0.41364 2.48014  
H -4.54911 0.10934 3.39235  
C -4.27511 1.81640 0.18968  
H -5.31892 1.70379 0.48273  
H -4.24611 2.17908 -0.84387  
H -3.85214 2.59233 0.83274

0 Imaginary Frequencies

E = -1128.44436172

H = -1127.782696

G = -1127.863061

$\Delta G = 0.3$

**(13S\*,17R\*,18R\*)-5 Conformer 3**

C -1.85006 0.74392 -0.25529  
H -1.33622 0.44124 -1.17822  
C -2.96986 1.71951 -0.70834  
H -2.53461 2.57770 -1.23050  
H -3.48919 2.12264 0.16679  
C -4.01392 1.04476 -1.60188  
H -3.56703 0.72901 -2.55166  
H -4.81096 1.75546 -1.84841  
C -4.63729 -0.16207 -0.89194  
H -5.36290 -0.64714 -1.55632  
O -5.40809 0.27039 0.24033  
H -4.78510 0.42966 0.96471  
C -3.56992 -1.21475 -0.47626  
C -2.94085 -1.84089 -1.74885  
H -2.25023 -2.64137 -1.46741  
H -2.38440 -1.12179 -2.35350  
H -3.72161 -2.27595 -2.38344  
C -4.27753 -2.35388 0.28255  
H -3.58587 -3.16869 0.51525  
H -5.07493 -2.76772 -0.34408  
H -4.73305 -2.00884 1.21306  
C -2.46828 -0.51772 0.35069  
C -2.01947 -1.02347 1.50865

|   |          |          |          |
|---|----------|----------|----------|
| H | -2.49633 | -1.90539 | 1.92813  |
| C | -0.83683 | -0.50611 | 2.28182  |
| H | -0.28025 | -1.36353 | 2.67499  |
| H | -1.19259 | 0.02320  | 3.17772  |
| C | 0.09396  | 0.42535  | 1.47502  |
| H | 0.62396  | 1.04538  | 2.21143  |
| C | -0.78058 | 1.44485  | 0.66339  |
| C | -1.48355 | 2.36341  | 1.69783  |
| H | -2.29489 | 1.85603  | 2.22826  |
| H | -1.90558 | 3.25343  | 1.22244  |
| H | -0.76065 | 2.70983  | 2.44415  |
| C | 1.26849  | -0.31176 | 0.71371  |
| C | 0.75766  | -1.40188 | -0.25022 |
| H | 0.18984  | -2.15623 | 0.30258  |
| H | 1.58547  | -1.89241 | -0.76052 |
| H | 0.09524  | -1.00627 | -1.02112 |
| C | 2.11953  | 0.81019  | 0.02246  |
| H | 2.33567  | 1.50687  | 0.84859  |
| C | 1.24270  | 1.60882  | -0.95893 |
| H | 0.81063  | 0.94981  | -1.72135 |
| H | 1.83504  | 2.34961  | -1.50502 |
| C | 0.13922  | 2.34917  | -0.19500 |
| H | -0.46767 | 2.94449  | -0.88754 |
| H | 0.62517  | 3.07347  | 0.47376  |
| C | 2.18217  | -0.98544 | 1.77226  |
| H | 1.66529  | -1.83298 | 2.23696  |
| H | 2.38159  | -0.26514 | 2.57938  |
| C | 3.52008  | -1.46978 | 1.20622  |
| H | 3.36076  | -2.25545 | 0.46227  |
| H | 4.10579  | -1.92245 | 2.01766  |
| C | 4.34822  | -0.33398 | 0.58285  |
| H | 4.53281  | 0.39127  | 1.39188  |
| C | 5.71838  | -0.86578 | 0.12931  |
| H | 6.36712  | -0.08006 | -0.26958 |
| H | 5.60362  | -1.63597 | -0.63860 |
| H | 6.24237  | -1.31547 | 0.98008  |
| C | 3.56793  | 0.46986  | -0.51254 |

|   |         |          |          |
|---|---------|----------|----------|
| C | 3.63482 | -0.18877 | -1.91098 |
| H | 4.63500 | 0.00184  | -2.32530 |
| H | 2.91659 | 0.31060  | -2.57607 |
| O | 3.40301 | -1.59943 | -1.89406 |
| H | 3.42009 | -1.90442 | -2.81093 |
| C | 4.29988 | 1.82921  | -0.70024 |
| H | 4.19586 | 2.45261  | 0.19334  |
| H | 3.90951 | 2.39729  | -1.54988 |
| H | 5.36780 | 1.68150  | -0.88175 |

0 Imaginary Frequencies

E = -1128.44354073

H = -1127.781901

G = -1127.86215

$\Delta G = 0.9$

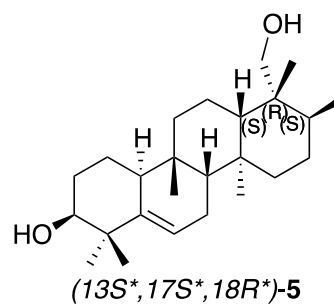

**(13S\*,17S\*,18R\*)-5 Conformer 1**

|   |         |          |          |
|---|---------|----------|----------|
| C | 1.82106 | 0.77782  | 0.02563  |
| H | 1.31596 | 0.74132  | 1.00032  |
| C | 2.88271 | 1.90433  | 0.14965  |
| H | 2.39829 | 2.85288  | 0.40160  |
| H | 3.37697 | 2.05872  | -0.81477 |
| C | 3.96563 | 1.58748  | 1.18454  |
| H | 3.53926 | 1.54698  | 2.19354  |
| H | 4.71898 | 2.38331  | 1.19208  |
| C | 4.65924 | 0.26109  | 0.85590  |
| H | 5.41291 | 0.03917  | 1.62127  |
| O | 5.40350 | 0.37817  | -0.36706 |
| H | 4.77199 | 0.28688  | -1.09556 |
| C | 3.65712 | -0.92617 | 0.79391  |
| C | 3.07184 | -1.18063 | 2.20827  |



|   |          |          |          |                                         |                |          |          |
|---|----------|----------|----------|-----------------------------------------|----------------|----------|----------|
| H | 3.87961  | -1.35947 | 2.92730  | H                                       | -3.24831       | -2.46684 | 0.48279  |
| H | 2.43249  | -2.06830 | 2.19223  | H                                       | -4.02563       | -2.71564 | -1.05919 |
| H | 2.47219  | -0.34874 | 2.58287  | C                                       | -4.32346       | -0.72719 | -0.25800 |
| C | 4.43078  | -2.19723 | 0.39263  | H                                       | -5.17496       | -1.02295 | 0.37384  |
| H | 4.85526  | -2.12264 | -0.61070 | C                                       | -4.94238       | -0.25689 | -1.58981 |
| H | 3.79197  | -3.08418 | 0.43466  | H                                       | -4.19801       | 0.14813  | -2.28208 |
| H | 5.25818  | -2.35482 | 1.09278  | H                                       | -5.70299       | 0.51243  | -1.43750 |
| C | 2.50831  | -0.57576 | -0.17612 | H                                       | -5.42709       | -1.10205 | -2.09062 |
| C | 2.07111  | -1.44382 | -1.10038 | C                                       | -3.53945       | 0.38468  | 0.52353  |
| H | 2.59251  | -2.38720 | -1.23763 | C                                       | -3.41846       | -0.00818 | 2.02109  |
| C | 0.84120  | -1.26386 | -1.94890 | H                                       | -2.75959       | 0.70417  | 2.52674  |
| H | 0.32239  | -2.22682 | -2.01009 | H                                       | -2.97874       | -1.00184 | 2.14473  |
| H | 1.14245  | -1.05152 | -2.98481 | O                                       | -4.65671       | 0.05704  | 2.73674  |
| C | -0.11721 | -0.15581 | -1.46042 | H                                       | -5.20785       | -0.67811 | 2.43798  |
| H | -0.68971 | 0.16757  | -2.34083 | C                                       | -4.34239       | 1.70793  | 0.48286  |
| C | 0.72384  | 1.10456  | -1.05383 | H                                       | -4.30071       | 2.17624  | -0.50485 |
| C | 1.38967  | 1.64569  | -2.34618 | H                                       | -3.96407       | 2.42947  | 1.21222  |
| H | 1.77493  | 2.65902  | -2.20243 | H                                       | -5.39065       | 1.52835  | 0.73340  |
| H | 0.65443  | 1.69296  | -3.15665 | 0 Imaginary Frequencies                 |                |          |          |
| H | 2.22071  | 1.01932  | -2.68346 | E =                                     | -1128.44373918 |          |          |
| C | -1.24558 | -0.64288 | -0.46124 | H =                                     | -1127.781931   |          |          |
| C | -0.65798 | -1.33108 | 0.79154  | G =                                     | -1127.862627   |          |          |
| H | -1.41850 | -1.87835 | 1.35009  | $\Delta G = 0.0$                        |                |          |          |
| H | -0.18855 | -0.63364 | 1.48730  | <b>(13S*,17S*,18R*)-5 S Conformer 2</b> |                |          |          |
| H | 0.10208  | -2.05864 | 0.49956  | C                                       | 1.72250        | -0.59685 | 0.46932  |
| C | -2.13917 | 0.61482  | -0.15778 | H                                       | 1.21874        | -1.12763 | -0.34933 |
| H | -2.41005 | 0.98846  | -1.15722 | C                                       | 2.76102        | -1.59638 | 1.04296  |
| C | -1.28771 | 1.73825  | 0.46406  | H                                       | 2.25905        | -2.50979 | 1.37669  |
| H | -0.81768 | 1.40788  | 1.39775  | H                                       | 3.23974        | -1.16829 | 1.92952  |
| H | -1.91173 | 2.59620  | 0.73081  | C                                       | 3.86260        | -1.95108 | 0.04058  |
| C | -0.22758 | 2.21106  | -0.53578 | H                                       | 3.44896        | -2.49956 | -0.81371 |
| H | 0.35560  | 3.03448  | -0.10774 | H                                       | 4.59935        | -2.61120 | 0.51234  |
| H | -0.75235 | 2.63714  | -1.40232 | C                                       | 4.58057        | -0.68783 | -0.44697 |
| C | -2.13543 | -1.68061 | -1.20208 | H                                       | 5.34894        | -0.95912 | -1.18121 |
| H | -1.58871 | -2.62077 | -1.33635 | O                                       | 5.30568        | -0.07941 | 0.63342  |
| H | -2.35557 | -1.30848 | -2.21121 | H                                       | 4.66587        | 0.42340  | 1.15846  |
| C | -3.45437 | -1.98123 | -0.47766 |                                         |                |          |          |

|   |          |          |          |
|---|----------|----------|----------|
| C | 3.60373  | 0.32333  | -1.10966 |
| C | 3.04416  | -0.28657 | -2.42225 |
| H | 2.42758  | -1.17265 | -2.25765 |
| H | 3.86536  | -0.57142 | -3.09020 |
| H | 2.42802  | 0.45282  | -2.94258 |
| C | 4.39854  | 1.58393  | -1.50255 |
| H | 4.80754  | 2.10163  | -0.63221 |
| H | 3.77908  | 2.28793  | -2.06549 |
| H | 5.23854  | 1.29963  | -2.14538 |
| C | 2.43139  | 0.61296  | -0.14762 |
| C | 1.98683  | 1.85936  | 0.07177  |
| H | 2.52087  | 2.70202  | -0.35921 |
| C | 0.73356  | 2.21722  | 0.82399  |
| H | 0.22323  | 3.01806  | 0.27733  |
| H | 1.00608  | 2.67520  | 1.78589  |
| C | -0.22279 | 1.03052  | 1.07784  |
| H | -0.81419 | 1.29274  | 1.96610  |
| C | 0.61867  | -0.21338 | 1.52216  |
| C | 1.27532  | 0.13438  | 2.88384  |
| H | 2.10889  | 0.83554  | 2.78134  |
| H | 1.65531  | -0.76164 | 3.38297  |
| H | 0.53594  | 0.58649  | 3.55368  |
| C | -1.33063 | 0.81750  | -0.03640 |
| C | -0.72194 | 0.64727  | -1.44812 |
| H | -0.31001 | -0.34912 | -1.61780 |
| H | 0.08131  | 1.36928  | -1.60774 |
| H | -1.46199 | 0.82371  | -2.23044 |
| C | -2.21793 | -0.39301 | 0.42967  |
| H | -2.54845 | -0.10039 | 1.43916  |
| C | -1.35715 | -1.64973 | 0.65393  |
| H | -0.87129 | -1.95643 | -0.27544 |
| H | -1.98780 | -2.49404 | 0.94629  |
| C | -0.33680 | -1.40494 | 1.76772  |
| H | 0.24258  | -2.31604 | 1.95768  |
| H | -0.88885 | -1.20541 | 2.69760  |
| C | -2.23544 | 2.08278  | -0.04394 |
| H | -1.69426 | 2.93446  | -0.47209 |

|   |          |          |          |
|---|----------|----------|----------|
| H | -2.46564 | 2.35953  | 0.99329  |
| C | -3.54988 | 1.90363  | -0.81753 |
| H | -3.33770 | 1.78406  | -1.88561 |
| H | -4.13974 | 2.82560  | -0.73902 |
| C | -4.40024 | 0.71882  | -0.31305 |
| H | -5.23057 | 0.58512  | -1.02243 |
| C | -5.04996 | 1.05810  | 1.04278  |
| H | -5.77919 | 0.30368  | 1.34777  |
| H | -5.58064 | 2.01344  | 0.96683  |
| H | -4.31911 | 1.15656  | 1.85126  |
| C | -3.58094 | -0.62222 | -0.32423 |
| C | -3.47673 | -1.06803 | -1.80185 |
| H | -3.06062 | -0.27563 | -2.43026 |
| H | -4.50265 | -1.25217 | -2.15969 |
| O | -2.69426 | -2.25692 | -1.92808 |
| H | -2.71512 | -2.51623 | -2.85855 |
| C | -4.38663 | -1.72931 | 0.39712  |
| H | -3.98157 | -2.71698 | 0.16898  |
| H | -5.42959 | -1.71730 | 0.05955  |
| H | -4.38435 | -1.60187 | 1.48351  |

0 Imaginary Frequencies

E = -1128.44237102

H = -1127.780412

G = -1127.860558

$\Delta G = 1.3$

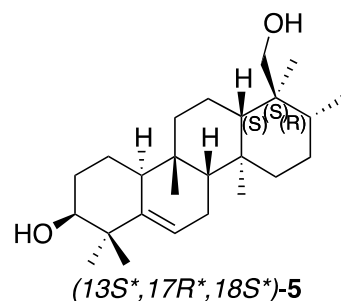

**(13S\*,17R\*,18S\*)-5 Conformer 1**

|   |          |         |          |
|---|----------|---------|----------|
| C | -1.82513 | 0.75876 | -0.12868 |
| H | -1.33939 | 0.59726 | -1.10042 |
| C | -2.87308 | 1.87689 | -0.37332 |

H -2.37898 2.78107 -0.74253  
H -3.35073 2.15314 0.57187  
C -3.97278 1.45323 -1.35024  
H -3.55909 1.28369 -2.35108  
H -4.71623 2.25256 -1.44714  
C -4.68062 0.18690 -0.85526  
H -5.44621 -0.11603 -1.57982  
O -5.40729 0.46438 0.35230  
H -4.76664 0.45296 1.07855  
C -3.69397 -0.99870 -0.65778  
C -3.12985 -1.43445 -2.03606  
H -2.50063 -2.32154 -1.91695  
H -2.52557 -0.66303 -2.51785  
H -3.94854 -1.69092 -2.71836  
C -4.47891 -2.19855 -0.09329  
H -3.85131 -3.09207 -0.03016  
H -5.31634 -2.43173 -0.75970  
H -4.89078 -1.99346 0.89714  
C -2.52853 -0.54785 0.24847  
C -2.09500 -1.29584 1.27374  
H -2.62922 -2.20453 1.53857  
C -0.85411 -1.02755 2.08206  
H -0.35217 -1.98384 2.26609  
H -1.14147 -0.67489 3.08316  
C 0.11845 -0.01126 1.44306  
H 0.70776 0.41494 2.26667  
C -0.70568 1.20035 0.88472  
C -1.33993 1.92376 2.10169  
H -2.17048 1.36098 2.53780  
H -1.71877 2.91198 1.82542  
H -0.58834 2.07431 2.88403  
C 1.22428 -0.65040 0.50760  
C 0.61526 -1.51500 -0.61749  
H -0.10490 -2.22596 -0.20558  
H 1.37928 -2.09748 -1.13290  
H 0.09464 -0.92648 -1.37444  
C 2.12744 0.52603 -0.00459

H 2.46481 1.02712 0.91311  
C 1.27874 1.57363 -0.74568  
H 0.77395 1.13471 -1.61475  
H 1.90965 2.37514 -1.14087  
C 0.25961 2.20384 0.21003  
H -0.31304 2.98317 -0.30665  
H 0.81997 2.72037 1.00186  
C 2.12074 -1.56217 1.38748  
H 1.56382 -2.44831 1.71266  
H 2.39267 -1.01422 2.30082  
C 3.40780 -2.01235 0.69076  
H 3.17629 -2.67720 -0.15193  
H 3.99691 -2.62092 1.38909  
C 4.27388 -0.83913 0.20790  
H 4.54220 -0.25138 1.09657  
C 5.58224 -1.37793 -0.39490  
H 6.27278 -0.58406 -0.69388  
H 5.39754 -2.00871 -1.27129  
H 6.10312 -1.99563 0.34499  
C 3.47965 0.14447 -0.71836  
C 4.31853 1.43482 -0.89757  
H 3.84298 2.08249 -1.64732  
H 5.30306 1.16378 -1.30156  
O 4.46172 2.12418 0.34418  
H 5.03684 2.88483 0.19042  
C 3.30367 -0.42114 -2.14713  
H 2.99591 -1.46792 -2.15373  
H 4.24523 -0.36158 -2.70403  
H 2.55779 0.14675 -2.71079

0 Imaginary Frequencies

E = -1128.44718865

H = -1127.785399

G = -1127.865859

$\Delta G = 0.0$

**(13S\*,17R\*,18S\*)-5 Conformer 2**

C -1.78976 0.72283 0.10952

|   |          |          |          |                         |                |          |          |
|---|----------|----------|----------|-------------------------|----------------|----------|----------|
| H | -1.24619 | 0.80917  | -0.84178 | H                       | 0.24018        | -0.49742 | -1.53170 |
| C | -2.79901 | 1.89996  | 0.11648  | C                       | 2.14677        | 0.44832  | 0.32588  |
| H | -2.26646 | 2.85365  | 0.04661  | H                       | 2.45114        | 0.62750  | 1.37064  |
| H | -3.35305 | 1.90854  | 1.05855  | C                       | 1.32249        | 1.68376  | -0.07707 |
| C | -3.81609 | 1.79240  | -1.01957 | H                       | 0.85310        | 1.53181  | -1.05688 |
| H | -3.32283 | 1.85228  | -1.99691 | H                       | 1.97720        | 2.54952  | -0.19297 |
| H | -4.51817 | 2.63654  | -0.98121 | C                       | 0.26009        | 1.99054  | 0.98295  |
| C | -4.60340 | 0.48379  | -0.91221 | H                       | -0.29043       | 2.89981  | 0.71450  |
| H | -5.29727 | 0.39997  | -1.76433 | H                       | 0.77859        | 2.22554  | 1.92389  |
| O | -5.35229 | 0.45337  | 0.31159  | C                       | 2.10027        | -1.95923 | 1.02048  |
| H | -5.91606 | 1.23909  | 0.32208  | H                       | 1.54000        | -2.90091 | 1.04576  |
| C | -3.68424 | -0.76471 | -0.93033 | H                       | 2.33608        | -1.71121 | 2.06521  |
| C | -3.07489 | -0.90680 | -2.35149 | C                       | 3.41008        | -2.18413 | 0.26272  |
| H | -2.49501 | -1.83225 | -2.41373 | H                       | 3.20637        | -2.56686 | -0.74551 |
| H | -2.40894 | -0.08200 | -2.61599 | H                       | 3.98302        | -2.97465 | 0.76405  |
| H | -3.86715 | -0.95242 | -3.10780 | C                       | 4.29376        | -0.92982 | 0.16181  |
| C | -4.55663 | -2.01112 | -0.68364 | H                       | 4.56689        | -0.65126 | 1.19277  |
| H | -4.96988 | -2.02100 | 0.32633  | C                       | 5.59331        | -1.30351 | -0.57491 |
| H | -3.98909 | -2.93309 | -0.84025 | H                       | 6.29043        | -0.46793 | -0.68026 |
| H | -5.39327 | -2.01962 | -1.39117 | H                       | 5.38471        | -1.68990 | -1.57812 |
| C | -2.53279 | -0.61564 | 0.08585  | H                       | 6.11522        | -2.09377 | -0.02431 |
| C | -2.12506 | -1.64256 | 0.84372  | C                       | 3.52744        | 0.30911  | -0.42790 |
| H | -2.67930 | -2.57718 | 0.82276  | C                       | 4.39994        | 1.54917  | -0.08042 |
| C | -0.90338 | -1.65020 | 1.72312  | H                       | 5.45827        | 1.29503  | -0.21663 |
| H | -0.40344 | -2.61866 | 1.61005  | H                       | 4.26135        | 1.79907  | 0.98282  |
| H | -1.21657 | -1.62755 | 2.77734  | O                       | 4.08647        | 2.67508  | -0.90704 |
| C | 0.08342  | -0.49030 | 1.46192  | H                       | 4.68538        | 3.38965  | -0.65306 |
| H | 0.63705  | -0.33454 | 2.39874  | C                       | 3.40549        | 0.22040  | -1.96386 |
| C | -0.72889 | 0.83519  | 1.26287  | H                       | 4.38180        | 0.36610  | -2.43574 |
| C | -1.44135 | 1.14908  | 2.60383  | H                       | 2.74409        | 0.99667  | -2.35316 |
| H | -0.74155 | 1.04195  | 3.43988  | H                       | 3.02193        | -0.74638 | -2.29382 |
| H | -2.29272 | 0.48729  | 2.78578  |                         |                |          |          |
| H | -1.81172 | 2.17815  | 2.62384  | 0 Imaginary Frequencies |                |          |          |
| C | 1.23050  | -0.82221 | 0.42106  | E =                     | -1128.44341691 |          |          |
| C | 0.67366  | -1.30367 | -0.93727 | H =                     | -1127.782273   |          |          |
| H | -0.10696 | -2.05253 | -0.78629 | G =                     | -1127.863607   |          |          |
| H | 1.44951  | -1.76760 | -1.54770 | $\Delta G = 1.4$        |                |          |          |

**(13S\*,17R\*,18S\*)-5 Conformer 3**

|                         |                |          |          |
|-------------------------|----------------|----------|----------|
| H                       | -0.13517       | -2.06945 | -0.63088 |
| H                       | 1.40127        | -1.79403 | -1.43753 |
| H                       | 0.15467        | -0.56295 | -1.49046 |
| C                       | 2.09900        | 0.53573  | 0.26806  |
| H                       | 2.37640        | 0.82509  | 1.29594  |
| C                       | 1.24880        | 1.70261  | -0.27632 |
| H                       | 0.77592        | 1.42646  | -1.22515 |
| H                       | 1.86171        | 2.57956  | -0.50042 |
| C                       | 0.18830        | 2.11542  | 0.74909  |
| H                       | -0.37178       | 2.98326  | 0.38256  |
| H                       | 0.70839        | 2.45785  | 1.65489  |
| C                       | 2.04095        | -1.82184 | 1.14834  |
| H                       | 1.46805        | -2.75035 | 1.24961  |
| H                       | 2.28953        | -1.49721 | 2.16902  |
| C                       | 3.33936        | -2.11676 | 0.39890  |
| H                       | 3.12666        | -2.55937 | -0.58278 |
| H                       | 3.90399        | -2.88225 | 0.94675  |
| C                       | 4.23742        | -0.88238 | 0.22849  |
| H                       | 4.48798        | -0.54070 | 1.24567  |
| C                       | 5.55268        | -1.31207 | -0.44544 |
| H                       | 6.25432        | -0.48384 | -0.53591 |
| H                       | 5.37116        | -1.71510 | -1.44831 |
| H                       | 6.02207        | -2.10947 | 0.14261  |
| C                       | 3.49669        | 0.32907  | -0.44737 |
| C                       | 4.30669        | 1.62424  | -0.15505 |
| H                       | 4.45915        | 1.70480  | 0.93294  |
| H                       | 3.73313        | 2.50285  | -0.46975 |
| O                       | 5.56505        | 1.63286  | -0.83546 |
| H                       | 5.94384        | 2.51406  | -0.72116 |
| C                       | 3.38423        | 0.16489  | -1.97734 |
| H                       | 2.72637        | 0.92647  | -2.40796 |
| H                       | 2.99185        | -0.81189 | -2.26677 |
| H                       | 4.36543        | 0.28214  | -2.44155 |
| 0 Imaginary Frequencies |                |          |          |
| E =                     | -1128.44247097 |          |          |
| H =                     | -1127.781332   |          |          |
| G =                     | -1127.862949   |          |          |
| C                       | -1.86095       | 0.75887  | 0.02820  |
| H                       | -1.32771       | 0.76507  | -0.93292 |
| C                       | -2.88581       | 1.91983  | -0.06109 |
| H                       | -2.36748       | 2.87113  | -0.21829 |
| H                       | -3.43472       | 2.00386  | 0.88024  |
| C                       | -3.90803       | 1.69957  | -1.17643 |
| H                       | -3.42139       | 1.68038  | -2.15865 |
| H                       | -4.62132       | 2.53455  | -1.20661 |
| C                       | -4.67689       | 0.39535  | -0.94896 |
| H                       | -5.37343       | 0.22677  | -1.78622 |
| O                       | -5.42030       | 0.46529  | 0.27702  |
| H                       | -5.98876       | 1.24577  | 0.22273  |
| C                       | -3.74160       | -0.83855 | -0.86010 |
| C                       | -3.13851       | -1.10079 | -2.26689 |
| H                       | -2.54297       | -2.01810 | -2.24890 |
| H                       | -2.48870       | -0.29287 | -2.61104 |
| H                       | -3.93463       | -1.22840 | -3.00956 |
| C                       | -4.59692       | -2.06815 | -0.49717 |
| H                       | -5.00478       | -1.99237 | 0.51209  |
| H                       | -4.01911       | -2.99383 | -0.57453 |
| H                       | -5.43712       | -2.14907 | -1.19577 |
| C                       | -2.58761       | -0.58426 | 0.13134  |
| C                       | -2.16605       | -1.53181 | 0.97947  |
| H                       | -2.70899       | -2.47076 | 1.04695  |
| C                       | -0.94391       | -1.44211 | 1.85352  |
| H                       | -0.43727       | -2.41313 | 1.83927  |
| H                       | -1.25730       | -1.31522 | 2.90017  |
| C                       | 0.03386        | -0.30702 | 1.47770  |
| H                       | 0.59030        | -0.05957 | 2.39278  |
| C                       | -0.78947       | 0.98781  | 1.15495  |
| C                       | -1.48767       | 1.43264  | 2.46548  |
| H                       | -2.33394       | 0.79005  | 2.72453  |
| H                       | -1.86142       | 2.45754  | 2.38735  |
| H                       | -0.77716       | 1.41125  | 3.29908  |
| C                       | 1.18054        | -0.72595 | 0.46768  |
| C                       | 0.62073        | -1.31170 | -0.84849 |

$\Delta G = 1.8$

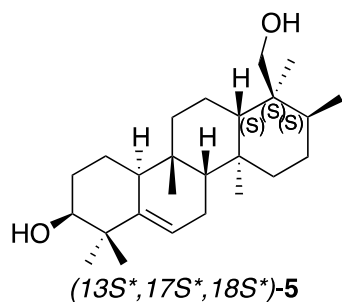

**(13S\*,17S\*,18S\*)-5 Conformer 1**

|   |         |          |          |
|---|---------|----------|----------|
| C | 1.82551 | -0.76971 | 0.11738  |
| H | 1.34838 | -0.89233 | -0.86521 |
| C | 2.84332 | -1.93267 | 0.23182  |
| H | 2.32494 | -2.89502 | 0.16948  |
| H | 3.34011 | -1.89801 | 1.20426  |
| C | 3.92354 | -1.86149 | -0.84907 |
| H | 3.48279 | -1.96120 | -1.84724 |
| H | 4.63282 | -2.68871 | -0.73202 |
| C | 4.69433 | -0.54688 | -0.75850 |
| H | 5.41690 | -0.48800 | -1.58831 |
| O | 5.40597 | -0.59096 | 0.48581  |
| H | 6.00687 | 0.16461  | 0.50983  |
| C | 3.76152 | 0.69828  | -0.86038 |
| C | 3.23220 | 0.79937  | -2.31629 |
| H | 2.64294 | 1.71317  | -2.43658 |
| H | 2.59631 | -0.04335 | -2.59720 |
| H | 4.06575 | 0.83886  | -3.02736 |
| C | 4.60906 | 1.95944  | -0.60008 |
| H | 4.93555 | 2.02848  | 0.44179  |
| H | 4.05288 | 2.87212  | -0.83093 |
| H | 5.49702 | 1.95356  | -1.24340 |
| C | 2.56215 | 0.57089  | 0.10022  |
| C | 2.11966 | 1.61040  | 0.82054  |
| H | 2.67108 | 2.54686  | 0.80750  |
| C | 0.85853 | 1.63026  | 1.64207  |
| H | 0.36940 | 2.60034  | 1.50083  |
| H | 1.12161 | 1.61157  | 2.70987  |

|   |          |          |          |
|---|----------|----------|----------|
| C | -0.12229 | 0.47526  | 1.34120  |
| H | -0.72597 | 0.33540  | 2.24906  |
| C | 0.68876  | -0.85917 | 1.20037  |
| C | 1.30622  | -1.17204 | 2.58825  |
| H | 1.67298  | -2.20135 | 2.63641  |
| H | 0.55003  | -1.06117 | 3.37299  |
| H | 2.14386  | -0.51138 | 2.82895  |
| C | -1.20918 | 0.80157  | 0.23735  |
| C | -0.57190 | 1.24311  | -1.09978 |
| H | -1.30486 | 1.70328  | -1.76280 |
| H | -0.11448 | 0.41987  | -1.65120 |
| H | 0.20883  | 1.98490  | -0.91890 |
| C | -2.13260 | -0.46552 | 0.12381  |
| H | -2.46271 | -0.64697 | 1.15866  |
| C | -1.29691 | -1.70486 | -0.24671 |
| H | -0.78943 | -1.56401 | -1.20821 |
| H | -1.93435 | -2.58469 | -0.37488 |
| C | -0.28493 | -2.01382 | 0.86292  |
| H | 0.28039  | -2.92003 | 0.61668  |
| H | -0.85194 | -2.25542 | 1.77324  |
| C | -2.08711 | 1.97321  | 0.75975  |
| H | -1.51342 | 2.90698  | 0.75361  |
| H | -2.34752 | 1.78273  | 1.80935  |
| C | -3.37393 | 2.18368  | -0.05062 |
| H | -3.12147 | 2.50721  | -1.06644 |
| H | -3.94395 | 3.01210  | 0.38872  |
| C | -4.27056 | 0.93216  | -0.10776 |
| H | -5.07850 | 1.13624  | -0.82091 |
| C | -4.95167 | 0.68585  | 1.25330  |
| H | -5.44196 | 1.60573  | 1.59160  |
| H | -4.24831 | 0.38907  | 2.03760  |
| H | -5.71860 | -0.08759 | 1.17391  |
| C | -3.47766 | -0.29888 | -0.67435 |
| C | -4.31372 | -1.58688 | -0.46938 |
| H | -4.34119 | -1.85635 | 0.59646  |
| H | -3.84604 | -2.42100 | -1.00754 |
| O | -5.63867 | -1.38244 | -0.96924 |

H -6.09040 -2.23579 -0.94429  
 C -3.30119 -0.14522 -2.20384  
 H -4.26194 -0.33269 -2.69197  
 H -2.57999 -0.86837 -2.59840  
 H -2.96973 0.84958 -2.50281

O Imaginary Frequencies

E = -1128.44284951

H = -1127.781365

G = -1127.861745

$\Delta G = 0.0$

**(13S\*,17S\*,18S\*)-5Conformer 2**

C 1.76003 0.75138 0.01776  
 H 1.31336 0.67000 1.01851  
 C 2.75130 1.94091 0.10486  
 H 2.21660 2.85770 0.37340  
 H 3.21515 2.11366 -0.86926  
 C 3.86793 1.68493 1.11830  
 H 3.45737 1.57056 2.12771  
 H 4.55496 2.53816 1.14988  
 C 4.66164 0.43696 0.74295  
 H 5.41687 0.23563 1.51977  
 O 5.32493 0.74736 -0.49043  
 H 5.94392 0.03143 -0.68190  
 C 3.76103 -0.82964 0.62625  
 C 3.29461 -1.23164 2.05164  
 H 2.72914 -2.16706 2.00991  
 H 2.65389 -0.47865 2.51670  
 H 4.15791 -1.38687 2.70954  
 C 4.62553 -1.98828 0.08965  
 H 4.90543 -1.84193 -0.95779  
 H 4.10361 -2.94637 0.15970  
 H 5.54118 -2.07763 0.68622  
 C 2.51789 -0.55201 -0.24359  
 C 2.05326 -1.45735 -1.11558  
 H 2.61712 -2.36934 -1.29367

C 0.75257 -1.36041 -1.86682  
 H 0.27876 -2.34849 -1.86465  
 H 0.96218 -1.16197 -2.92823  
 C -0.22053 -0.28723 -1.33194  
 H -0.86357 -0.00273 -2.17652  
 C 0.58728 1.01522 -0.99532  
 C 1.16091 1.56098 -2.32869  
 H 1.51470 2.58970 -2.21572  
 H 0.38390 1.56928 -3.10085  
 H 1.99852 0.96107 -2.69549  
 C -1.25865 -0.80659 -0.25500  
 C -0.56385 -1.44917 0.96728  
 H -1.26466 -2.01659 1.58097  
 H -0.08489 -0.72005 1.62279  
 H 0.20896 -2.14841 0.63978  
 C -2.18495 0.41371 0.08976  
 H -2.55373 0.75602 -0.88591  
 C -1.35511 1.59000 0.63308  
 H -0.81618 1.30863 1.54562  
 H -2.00910 2.42210 0.90900  
 C -0.38223 2.08734 -0.44073  
 H 0.18546 2.94838 -0.06968  
 H -0.98122 2.46603 -1.28063  
 C -2.15099 -1.89206 -0.92229  
 H -1.57292 -2.80817 -1.08913  
 H -2.45714 -1.54001 -1.91605  
 C -3.40021 -2.24720 -0.10354  
 H -3.10177 -2.72440 0.83644  
 H -3.98073 -3.00549 -0.64434  
 C -4.30646 -1.03286 0.18631  
 H -5.06867 -1.35711 0.91061  
 C -5.07088 -0.62451 -1.08855  
 H -5.63349 -1.48725 -1.46406  
 H -4.40500 -0.29161 -1.88978  
 H -5.77656 0.18664 -0.90250  
 C -3.49644 0.11310 0.89024  
 C -4.35774 1.39965 0.99150

H -3.95864 2.03649 1.79404  
H -5.37374 1.10342 1.29689  
O -4.39156 2.13068 -0.23372  
H -4.93889 2.91312 -0.08613  
C -3.26609 -0.28320 2.37032  
H -4.20748 -0.20027 2.92752  
H -2.53895 0.37471 2.85523  
H -2.91759 -1.30893 2.48830

0 Imaginary Frequencies

E = -1128.44210509

H = -1127.780214

G = -1127.860013

$\Delta G = 1.1$

**(13S\*,17S\*,18S\*)-5Conformer 3**

C -1.75032 0.71935 0.21555  
H -1.26979 0.93601 -0.74867  
C -2.74301 1.88582 0.45454  
H -2.20381 2.83792 0.49231  
H -3.24128 1.76035 1.41904  
C -3.82269 1.95296 -0.62741  
H -3.37686 2.14585 -1.60953  
H -4.51268 2.77988 -0.42475  
C -4.62326 0.65459 -0.67433  
H -5.34500 0.69864 -1.50579  
O -5.33720 0.58636 0.56773  
H -5.95761 -0.15158 0.51284  
C -3.71966 -0.59516 -0.90585  
C -3.19575 -0.55696 -2.36680  
H -2.63372 -1.46942 -2.58617  
H -2.53500 0.29191 -2.55779  
H -4.03102 -0.49550 -3.07437  
C -4.59839 -1.85499 -0.77220  
H -4.91928 -2.02415 0.25994  
H -4.06973 -2.75261 -1.10407  
H -5.49017 -1.75676 -1.40254  
C -2.51326 -0.59706 0.05357

C -2.08210 -1.72157 0.64142  
H -2.65108 -2.64053 0.52604  
C -0.81125 -1.85938 1.43664  
H -0.33740 -2.81012 1.16811  
H -1.06160 -1.97207 2.50173  
C 0.18082 -0.68719 1.27004  
H 0.79271 -0.66626 2.18276  
C -0.61530 0.66345 1.30100  
C -1.23529 0.80129 2.71595  
H -1.57629 1.82371 2.90243  
H -0.48787 0.56559 3.48151  
H -2.09053 0.13519 2.86045  
C 1.25746 -0.88465 0.12429  
C 0.60593 -1.13558 -1.25562  
H 1.32029 -1.54176 -1.97284  
H 0.18323 -0.23376 -1.70203  
H -0.20264 -1.86399 -1.16485  
C 2.20022 0.37432 0.17677  
H 2.53291 0.41013 1.22632  
C 1.38399 1.66401 -0.02391  
H 0.87362 1.65427 -0.99467  
H 2.05045 2.52825 -0.05010  
C 0.37567 1.83763 1.11584  
H -0.17605 2.77686 0.99269  
H 0.94239 1.94826 2.05158  
C 2.11354 -2.13228 0.48012  
H 1.52653 -3.04715 0.34040  
H 2.37233 -2.09710 1.54652  
C 3.40130 -2.24896 -0.34756  
H 3.15256 -2.42585 -1.39945  
H 3.95794 -3.13785 -0.02458  
C 4.31430 -1.01425 -0.22554  
H 5.12986 -1.13349 -0.95367  
C 4.97905 -0.98055 1.16773  
H 5.45116 -1.94812 1.37029  
H 4.26520 -0.79329 1.97555  
H 5.76207 -0.22095 1.23686



|   |         |          |          |
|---|---------|----------|----------|
| C | 3.54902 | 0.29786  | -0.63043 |
| C | 4.46843 | 1.49000  | -0.25619 |
| H | 5.50336 | 1.21717  | -0.51635 |
| H | 4.43695 | 1.66642  | 0.82801  |
| O | 4.10635 | 2.68112  | -0.96159 |
| H | 4.69670 | 3.38208  | -0.65519 |
| C | 3.38154 | 0.33324  | -2.16629 |
| H | 4.35983 | 0.46427  | -2.64261 |
| H | 2.75318 | 1.16847  | -2.48109 |
| H | 2.94713 | -0.58440 | -2.56131 |

0 Imaginary Frequencies

E = -1128.44131415

H = -1127.77944

G = -1127.859136

$\Delta G = 1.6$

## Theoretical Prediction of Optical Rotation of **5**

The optical rotation of **5** was predicted using the method of Stephens et al.<sup>[15]</sup> According to this method, the absolute configuration of a conformationally rigid molecule may be predicted with 95% confidence if the specific rotation calculated at the TD-B3LYP/aug-cc-pVDZ//B3LYP/6-31G(d) level of theory for one, but not both, of the enantiomers lies within  $\pm 57.8$  of the experimental value. (The value of  $\pm 57.8$  corresponds to  $\pm 2\sigma$  from a benchmark set of  $[\alpha]_D$  values for 65 molecules.). For **5**, the experimental  $[\alpha]_D$  is +32 (*c* 0.23, CHCl<sub>3</sub>), and therefore, for its absolute stereochemistry to be predicted with 95% confidence, the computed  $[\alpha]_D$  for one enantiomer must lie within the range  $-25.8$  to  $+89.8$  and the value for the other enantiomer must lie outside this range.

The computed  $[\alpha]_D$  values for the enantiomers of **5** are shown in Figure S2. For the absolute stereochemistry corresponding to that drawn in Figure 1 of the paper (**5**), the computed  $[\alpha]_D$  value is +73. The  $[\alpha]_D$  value for the opposite enantiomer (*ent-5*) is  $-73$ . These values permit the absolute stereochemistry of **5** to be assigned with 95% confidence as that shown in Figures 1 and S2.

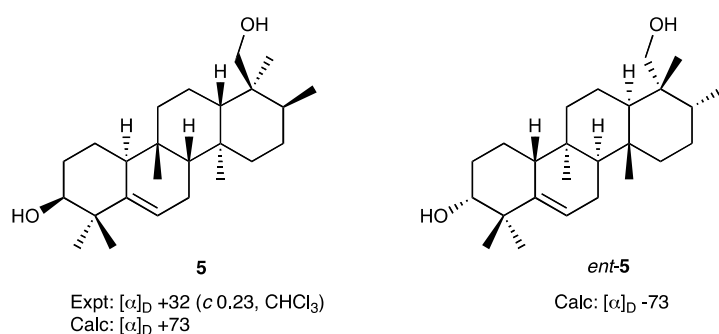

**Figure S2.** Comparison of experimental and calculated  $[\alpha]_D$  values for the enantiomers of **5**.

Optimized geometry of **5** at the B3LYP/6-31G(d) level of theory

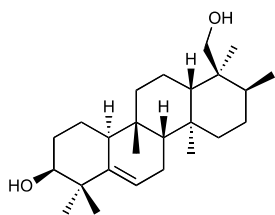

| 5 |           |           |           |
|---|-----------|-----------|-----------|
| C | 1.827669  | -0.769794 | 0.112803  |
| H | 1.350300  | -0.892606 | -0.870720 |
| C | 2.847121  | -1.931786 | 0.228239  |
| H | 2.329010  | -2.895547 | 0.166014  |
| H | 3.347432  | -1.894980 | 1.198908  |
| C | 3.926275  | -1.860678 | -0.854113 |
| H | 3.486371  | -1.959685 | -1.854108 |
| H | 4.637346  | -2.686532 | -0.734328 |
| C | 4.697142  | -0.546360 | -0.757597 |
| H | 5.422928  | -0.484829 | -1.586839 |
| O | 5.401083  | -0.603300 | 0.486041  |
| H | 5.955477  | 0.187897  | 0.551732  |
| C | 3.765425  | 0.700518  | -0.857362 |
| C | 3.241817  | 0.811420  | -2.314494 |
| H | 2.649503  | 1.724821  | -2.432109 |
| H | 2.607811  | -0.031457 | -2.602953 |
| H | 4.077795  | 0.856504  | -3.024388 |
| C | 4.613798  | 1.960130  | -0.588557 |
| H | 4.924831  | 2.032680  | 0.459333  |
| H | 4.063866  | 2.875537  | -0.828214 |
| H | 5.511120  | 1.952131  | -1.221542 |
| C | 2.563341  | 0.571590  | 0.098678  |
| C | 2.119535  | 1.609682  | 0.819606  |
| H | 2.670848  | 2.547016  | 0.811123  |
| C | 0.858876  | 1.628126  | 1.642153  |
| H | 0.368662  | 2.599154  | 1.504762  |
| H | 1.123741  | 1.604719  | 2.710228  |
| C | -0.122028 | 0.473566  | 1.338576  |
| H | -0.725589 | 0.332463  | 2.247260  |
| C | 0.690887  | -0.859978 | 1.195917  |
| C | 1.310699  | -1.173922 | 2.582737  |
| H | 1.671778  | -2.206210 | 2.631485  |
| H | 0.557344  | -1.057830 | 3.371115  |
| H | 2.154682  | -0.518448 | 2.819185  |
| C | -1.209679 | 0.801368  | 0.235155  |
| C | -0.573308 | 1.245617  | -1.101637 |
| H | -1.307074 | 1.706851  | -1.764321 |
| H | -0.115185 | 0.423590  | -1.656237 |
| H | 0.207871  | 1.988303  | -0.920314 |
| C | -2.133138 | -0.466307 | 0.121859  |
| H | -2.461485 | -0.648705 | 1.158026  |
| C | -1.296624 | -1.705231 | -0.250014 |
| H | -0.790323 | -1.563835 | -1.212872 |
| H | -1.933842 | -2.586701 | -0.377695 |
| C | -0.282741 | -2.014649 | 0.858397  |
| H | 0.282449  | -2.921375 | 0.609917  |
| H | -0.848907 | -2.258613 | 1.769782  |
| C | -2.088611 | 1.972341  | 0.758537  |
| H | -1.516183 | 2.907968  | 0.749823  |
| H | -2.346731 | 1.783557  | 1.809947  |
| C | -3.378373 | 2.181214  | -0.048551 |
| H | -3.129211 | 2.507823  | -1.065068 |
| H | -3.948070 | 3.008946  | 0.394532  |

|   |           |           |           |
|---|-----------|-----------|-----------|
| C | -4.274500 | 0.929122  | -0.104996 |
| H | -5.085109 | 1.131290  | -0.815845 |
| C | -4.953689 | 0.681788  | 1.257283  |
| H | -5.437749 | 1.604535  | 1.599858  |
| H | -4.251293 | 0.377529  | 2.041366  |
| H | -5.728664 | -0.084330 | 1.174747  |
| C | -3.479699 | -0.299922 | -0.674079 |
| C | -4.315511 | -1.587988 | -0.469075 |
| H | -4.338897 | -1.861796 | 0.597021  |
| H | -3.852225 | -2.421241 | -1.015108 |
| O | -5.640133 | -1.374281 | -0.961724 |
| H | -6.101407 | -2.225643 | -0.940745 |
| C | -3.309708 | -0.146425 | -2.204518 |
| H | -4.273958 | -0.329914 | -2.688982 |
| H | -2.590752 | -0.871336 | -2.603503 |
| H | -2.975968 | 0.848301  | -2.504483 |

0 imaginary frequencies  
E = -1128.367853

## Carbocation Rearrangements Leading to **5** and **6**

Density functional theory calculations at the B3LYP/6-31+G(d,p) level of theory in the gas phase were performed to investigate the proposed biosynthetic pathways leading to **5** and **6** (Figure 2). The global minimum conformations of the C-18 epimeric carbocations  $\alpha$ -C and  $\beta$ -C were identified as D-ring chair conformers by means of conformational searching. Transition states for 1,2 hydride migrations from C-18 to C-17 in  $\alpha$ -C and  $\beta$ -C were computed. Intrinsic Reaction Coordinate (IRC)<sup>[16]</sup> calculations were performed to determine the conformation of the reactant immediately preceding each TS. For  $\alpha$ -C, the IRC path back to reactants led directly to the global minimum conformer, while for  $\beta$ -C, the IRC led to a twist-boat conformer that lay 4.7 kcal/mol above the global minimum. The boat transition state for cyclization of **B** to form  $\beta$ -C was also calculated. An IRC calculation on this TS indicated that the D ring in the immediate product adopted the twist-boat conformation.

### *Optimized geometries at the B3LYP/6-31+G(d,p) level of theory*

Gibbs free energies (G) for these species are reported at a standard state of 1 atm (25 °C).

#### $\alpha$ -C

|   |           |           |           |
|---|-----------|-----------|-----------|
| C | -2.492677 | -1.662981 | 0.851720  |
| C | -1.962166 | -0.822866 | -0.337223 |
| C | -2.648475 | 0.581517  | -0.235891 |
| C | -4.214617 | 0.617104  | -0.273221 |
| C | -4.685940 | -0.324711 | 0.873133  |
| C | -4.032772 | -1.713386 | 0.868305  |
| C | -1.902121 | 1.581136  | -1.130206 |
| C | -0.505678 | 1.906385  | -0.541189 |
| C | 0.179643  | 0.720261  | 0.232059  |
| C | -0.383832 | -0.620082 | -0.347201 |
| C | 1.724051  | 0.746737  | -0.138485 |
| C | 2.560644  | -0.498829 | 0.293350  |
| C | 1.882418  | -1.784280 | -0.228017 |
| C | 0.394186  | -1.841069 | 0.167081  |
| C | 2.429675  | 2.051110  | 0.244001  |
| C | 3.872886  | 2.127516  | -0.413390 |
| C | 4.567277  | 0.890979  | -0.034662 |
| C | 4.001237  | -0.356081 | -0.536131 |
| C | 4.917848  | -1.580818 | -0.487348 |
| O | 6.116149  | -1.194955 | -1.159762 |
| C | 2.847424  | -0.627389 | 1.802666  |
| C | 5.694338  | 0.946855  | 0.904341  |
| C | -0.037878 | 0.896207  | 1.755805  |
| C | -2.256932 | -1.582592 | -1.657998 |

|   |           |           |           |
|---|-----------|-----------|-----------|
| C | -4.691382 | 2.045883  | 0.088732  |
| C | -4.864366 | 0.253525  | -1.626253 |
| O | -6.109762 | -0.428929 | 0.796417  |
| H | 4.394194  | 3.024528  | -0.073091 |
| H | 3.728321  | 2.170337  | -1.498271 |
| H | -3.252990 | -2.019035 | -1.689549 |
| H | -1.550046 | -2.410886 | -1.781332 |
| H | -2.155206 | -0.934204 | -2.533569 |
| H | -2.107976 | -2.688806 | 0.813675  |
| H | -2.139811 | -1.231186 | 1.797976  |
| H | -4.362251 | -2.259410 | 1.762390  |
| H | -4.414147 | -2.280542 | 0.012929  |
| H | -4.542896 | 2.746980  | -0.738190 |
| H | -4.165632 | 2.439934  | 0.967571  |
| H | -5.760411 | 2.027137  | 0.314939  |
| H | -4.826561 | -0.810260 | -1.859632 |
| H | -4.381291 | 0.798706  | -2.444558 |
| H | -5.919364 | 0.536295  | -1.613300 |
| H | -2.451062 | 0.909900  | 0.790696  |
| H | -2.455472 | 2.517471  | -1.234644 |
| H | -1.797614 | 1.180165  | -2.145196 |
| H | -0.596600 | 2.761223  | 0.139863  |
| H | 0.138154  | 2.240269  | -1.364492 |
| H | 0.220944  | 0.009046  | 2.335182  |
| H | 0.550977  | 1.731757  | 2.147655  |
| H | -1.077814 | 1.126127  | 1.983557  |
| H | -0.137933 | -0.549278 | -1.417975 |
| H | 1.716929  | 0.711295  | -1.237407 |
| H | 1.964668  | -0.982079 | 2.332330  |
| H | 3.151027  | 0.310829  | 2.274957  |
| H | 3.633693  | -1.363614 | 1.990951  |
| H | 2.399413  | -2.670802 | 0.155689  |
| H | 1.950537  | -1.817115 | -1.323166 |
| H | 0.287380  | -1.951886 | 1.251320  |
| H | -0.015663 | -2.759937 | -0.264408 |
| H | 2.527839  | 2.171253  | 1.325901  |
| H | 1.893420  | 2.927622  | -0.124973 |
| H | 5.668845  | 1.833316  | 1.543086  |
| H | 6.582902  | 1.039334  | 0.251054  |
| H | 5.846278  | 0.031276  | 1.477296  |
| H | 4.426278  | -2.411518 | -1.003045 |
| H | 5.132488  | -1.899890 | 0.540549  |
| H | 6.664284  | -1.971308 | -1.336451 |
| H | 3.674607  | -0.208102 | -1.569900 |
| H | -4.411959 | 0.174640  | 1.819215  |
| H | -6.438311 | -0.909293 | 1.567263  |

0 imaginary frequencies  
E = -1128.802623  
G = -1128.212888

### TS: 1,2-Hydride Shift from C-18 to C-17 in $\alpha$ -C

|   |           |           |           |
|---|-----------|-----------|-----------|
| C | -2.503919 | -1.691718 | 0.750563  |
| C | -1.911057 | -0.792634 | -0.363447 |
| C | -2.602820 | 0.605453  | -0.224736 |
| C | -4.164334 | 0.646638  | -0.346859 |
| C | -4.698306 | -0.353716 | 0.719734  |
| C | -4.042681 | -1.740905 | 0.681179  |
| C | -1.807426 | 1.649941  | -1.020325 |
| C | -0.448098 | 1.940208  | -0.334490 |
| C | 0.196624  | 0.711165  | 0.406361  |
| C | -0.337393 | -0.590091 | -0.276586 |
| C | 1.748486  | 0.766795  | 0.132018  |

|   |           |           |           |
|---|-----------|-----------|-----------|
| C | 2.587752  | -0.498861 | 0.527799  |
| C | 1.919757  | -1.763266 | -0.087211 |
| C | 0.415392  | -1.835900 | 0.213711  |
| C | 2.445491  | 2.044604  | 0.627219  |
| C | 3.804136  | 2.217544  | -0.059769 |
| C | 4.569171  | 0.917960  | -0.303560 |
| C | 4.017084  | -0.340181 | 0.065069  |
| C | 4.909283  | -1.575543 | -0.084441 |
| O | 5.147533  | -1.716111 | -1.481831 |
| C | 2.806765  | -0.718872 | 2.068502  |
| C | 6.055487  | 1.101871  | -0.577717 |
| C | -0.102603 | 0.803577  | 1.924766  |
| C | -2.132726 | -1.482837 | -1.735795 |
| C | -4.661771 | 2.055175  | 0.062913  |
| C | -4.736918 | 0.356286  | -1.751489 |
| O | -6.115358 | -0.454003 | 0.556133  |
| H | 4.469071  | 2.853757  | 0.536027  |
| H | 3.696323  | 2.731574  | -1.022777 |
| H | -3.124770 | -1.915785 | -1.844945 |
| H | -1.419140 | -2.305090 | -1.862558 |
| H | -1.983220 | -0.790941 | -2.570467 |
| H | -2.116321 | -2.714958 | 0.681869  |
| H | -2.203701 | -1.307993 | 1.734901  |
| H | -4.376089 | -2.264766 | -0.220655 |
| H | -4.419533 | -2.330330 | 1.527800  |
| H | -4.468080 | 2.798049  | -0.716777 |
| H | -4.185034 | 2.400980  | 0.988714  |
| H | -5.741682 | 2.027042  | 0.228616  |
| H | -4.679931 | -0.692735 | -2.040926 |
| H | -4.212537 | 0.947136  | -2.510597 |
| H | -5.792664 | 0.635218  | -1.781516 |
| H | -2.461270 | 0.876703  | 0.827687  |
| H | -2.354842 | 2.591529  | -1.107400 |
| H | -1.644328 | 1.302328  | -2.047099 |
| H | -0.581151 | 2.755356  | 0.386574  |
| H | 0.241650  | 2.321332  | -1.098117 |
| H | 0.078169  | -0.131172 | 2.459367  |
| H | 0.503082  | 1.581434  | 2.400696  |
| H | -1.141789 | 1.072198  | 2.110829  |
| H | -0.032319 | -0.462026 | -1.326934 |
| H | 1.811000  | 0.787783  | -0.969567 |
| H | 1.870164  | -1.044219 | 2.518505  |
| H | 3.139276  | 0.184961  | 2.581285  |
| H | 3.539801  | -1.508772 | 2.262834  |
| H | 2.399581  | -2.674015 | 0.285221  |
| H | 2.062813  | -1.748694 | -1.175253 |
| H | 0.248044  | -2.002718 | 1.283526  |
| H | 0.030830  | -2.730596 | -0.285821 |
| H | 2.581037  | 2.018465  | 1.712771  |
| H | 1.832532  | 2.923984  | 0.420772  |
| H | 6.204046  | 1.974452  | -1.218539 |
| H | 6.517447  | 0.240054  | -1.056585 |
| H | 6.560459  | 1.304988  | 0.373503  |
| H | 4.409012  | -2.452497 | 0.328518  |
| H | 5.841737  | -1.408722 | 0.472494  |
| H | 5.575850  | -2.565200 | -1.661597 |
| H | 4.084429  | 0.359427  | -1.268380 |
| H | -4.481183 | 0.095725  | 1.704652  |
| H | -6.486432 | -0.968488 | 1.284469  |

l imaginary frequency

E = -1128.782887

G = -1128.196004

**$\alpha$ -D**

|   |           |           |           |
|---|-----------|-----------|-----------|
| C | -2.513780 | -1.687423 | 0.764734  |
| C | -1.923911 | -0.796388 | -0.357450 |
| C | -2.613554 | 0.603262  | -0.226025 |
| C | -4.175447 | 0.645071  | -0.342809 |
| C | -4.706972 | -0.347794 | 0.732064  |
| C | -4.052746 | -1.735874 | 0.700429  |
| C | -1.819297 | 1.641061  | -1.031418 |
| C | -0.460084 | 1.936802  | -0.348627 |
| C | 0.191477  | 0.709857  | 0.390220  |
| C | -0.349080 | -0.595355 | -0.278097 |
| C | 1.742542  | 0.769943  | 0.098814  |
| C | 2.587652  | -0.498156 | 0.461990  |
| C | 1.899519  | -1.783017 | -0.099669 |
| C | 0.401251  | -1.835431 | 0.227645  |
| C | 2.439607  | 2.037584  | 0.619345  |
| C | 3.823695  | 2.219010  | -0.019374 |
| C | 4.548675  | 0.910718  | -0.423236 |
| C | 3.989566  | -0.359135 | 0.018497  |
| C | 4.887664  | -1.584187 | -0.077764 |
| O | 5.254122  | -1.683930 | -1.449173 |
| C | 2.871339  | -0.702650 | 2.019331  |
| C | 6.077015  | 1.080596  | -0.466396 |
| C | -0.100140 | 0.807018  | 1.910356  |
| C | -2.150478 | -1.496289 | -1.723944 |
| C | -4.669837 | 2.056747  | 0.059765  |
| C | -4.753236 | 0.346406  | -1.743553 |
| O | -6.124392 | -0.448005 | 0.573318  |
| H | 4.491638  | 2.749703  | 0.667685  |
| H | 3.756949  | 2.846683  | -0.913699 |
| H | -3.143948 | -1.927107 | -1.827710 |
| H | -1.439523 | -2.321714 | -1.845924 |
| H | -2.000672 | -0.811185 | -2.564090 |
| H | -2.127567 | -2.711628 | 0.701840  |
| H | -2.210408 | -1.297408 | 1.745644  |
| H | -4.389283 | -2.265182 | -0.197014 |
| H | -4.427339 | -2.319607 | 1.551921  |
| H | -4.477880 | 2.794596  | -0.725072 |
| H | -4.189851 | 2.407791  | 0.981910  |
| H | -5.749227 | 2.030842  | 0.229079  |
| H | -4.698230 | -0.704446 | -2.026739 |
| H | -4.231264 | 0.932184  | -2.508200 |
| H | -5.808857 | 0.625936  | -1.771417 |
| H | -2.468112 | 0.881785  | 0.824107  |
| H | -2.366443 | 2.582131  | -1.125252 |
| H | -1.657245 | 1.285458  | -2.055637 |
| H | -0.595515 | 2.750425  | 0.373549  |
| H | 0.226821  | 2.322150  | -1.112358 |
| H | 0.080647  | -0.126360 | 2.449011  |
| H | 0.504213  | 1.587487  | 2.382563  |
| H | -1.139573 | 1.073096  | 2.098693  |
| H | -0.046300 | -0.481315 | -1.330596 |
| H | 1.797346  | 0.809490  | -1.001242 |
| H | 1.904193  | -0.876659 | 2.489941  |
| H | 3.332126  | 0.165143  | 2.492460  |
| H | 3.491913  | -1.582074 | 2.207475  |
| H | 2.383214  | -2.683670 | 0.288660  |
| H | 2.024953  | -1.793546 | -1.189299 |
| H | 0.249277  | -1.980715 | 1.302898  |
| H | 0.006680  | -2.738514 | -0.249109 |
| H | 2.536341  | 1.998541  | 1.708284  |
| H | 1.831600  | 2.918828  | 0.406145  |
| H | 6.313964  | 2.010526  | -0.988835 |



|   |           |           |           |
|---|-----------|-----------|-----------|
| H | 6.579326  | 0.264555  | -0.984196 |
| H | 6.469968  | 1.168537  | 0.552091  |
| H | 4.376209  | -2.483155 | 0.268165  |
| H | 5.761671  | -1.406447 | 0.569407  |
| H | 5.738304  | -2.509146 | -1.595184 |
| H | 4.224271  | 0.661474  | -1.483430 |
| H | -4.486324 | 0.107847  | 1.713357  |
| H | -6.494545 | -0.954098 | 1.307979  |

0 imaginary frequencies  
E = -1128.783959  
G = -1128.196906

### **$\beta$ -C (global minimum: D ring chair conformation)**

|   |           |           |           |
|---|-----------|-----------|-----------|
| C | 2.551250  | -1.633267 | -0.846960 |
| C | 1.934883  | -0.815936 | 0.316032  |
| C | 2.552267  | 0.621158  | 0.230657  |
| C | 4.111425  | 0.737098  | 0.327034  |
| C | 4.674003  | -0.184870 | -0.794232 |
| C | 4.091428  | -1.605118 | -0.806621 |
| C | 1.721283  | 1.585952  | 1.087983  |
| C | 0.335633  | 1.835712  | 0.440270  |
| C | -0.257966 | 0.610195  | -0.347676 |
| C | 0.348575  | -0.695972 | 0.265503  |
| C | -1.817288 | 0.566409  | -0.040200 |
| C | -2.571131 | -0.726581 | -0.480737 |
| C | -1.849228 | -1.966524 | 0.088281  |
| C | -0.348964 | -1.961712 | -0.261193 |
| C | -2.570112 | 1.826684  | -0.477194 |
| C | -4.035939 | 1.846425  | 0.142265  |
| C | -4.663823 | 0.602450  | -0.299466 |
| C | -4.080438 | -0.673270 | 0.145301  |
| C | -4.188549 | -0.811654 | 1.680017  |
| O | -5.537500 | -0.451697 | 1.980672  |
| C | -2.758994 | -0.899002 | -2.005500 |
| C | -5.783006 | 0.622258  | -1.244191 |
| C | 0.014189  | 0.784177  | -1.863574 |
| C | 2.218795  | -1.552559 | 1.652587  |
| C | 4.527009  | 2.186948  | -0.026764 |
| C | 4.727554  | 0.414229  | 1.705696  |
| O | 6.097273  | -0.217060 | -0.661196 |
| H | -4.581656 | 2.733398  | -0.184142 |
| H | -3.916400 | 1.864206  | 1.229631  |
| H | 3.233368  | -1.938928 | 1.724223  |
| H | 1.549632  | -2.414027 | 1.756697  |
| H | 2.053417  | -0.904384 | 2.518749  |
| H | 2.217883  | -2.676850 | -0.816304 |
| H | 2.212065  | -1.223954 | -1.807920 |
| H | 4.481542  | -2.136407 | -1.684943 |
| H | 4.469107  | -2.149082 | 0.065279  |
| H | 4.310479  | 2.883847  | 0.788741  |
| H | 4.015137  | 2.547878  | -0.927718 |
| H | 5.603477  | 2.223501  | -0.212016 |
| H | 4.740529  | -0.649431 | 1.941874  |
| H | 4.183854  | 0.933429  | 2.502582  |
| H | 5.764985  | 0.755144  | 1.731669  |
| H | 2.377893  | 0.932754  | -0.805222 |
| H | 2.221871  | 2.549461  | 1.209367  |
| H | 1.596150  | 1.184109  | 2.100437  |
| H | 0.412103  | 2.688488  | -0.245212 |
| H | -0.357035 | 2.144319  | 1.233455  |
| H | -0.122494 | -0.134640 | -2.435304 |
| H | -0.635354 | 1.548100  | -2.302557 |

|   |           |           |           |
|---|-----------|-----------|-----------|
| H | 1.035526  | 1.115749  | -2.046867 |
| H | 0.060176  | -0.628367 | 1.325910  |
| H | -1.846913 | 0.559447  | 1.057464  |
| H | -3.478137 | -1.700172 | -2.207057 |
| H | -1.829469 | -1.185068 | -2.493099 |
| H | -3.120132 | 0.003922  | -2.507419 |
| H | -2.329231 | -2.880486 | -0.282877 |
| H | -1.930132 | -1.982726 | 1.180946  |
| H | -0.200864 | -2.077797 | -1.339593 |
| H | 0.094373  | -2.852714 | 0.194474  |
| H | -2.641124 | 1.920627  | -1.563668 |
| H | -2.091244 | 2.736681  | -0.109325 |
| H | -5.880898 | 1.556287  | -1.801615 |
| H | -6.665182 | 0.543909  | -0.575318 |
| H | -5.823853 | -0.257518 | -1.891199 |
| H | -3.480997 | -0.157938 | 2.203005  |
| H | -3.982786 | -1.848411 | 1.962073  |
| H | -5.749548 | -0.667219 | 2.899303  |
| H | -4.638475 | -1.504637 | -0.294961 |
| H | 4.413400  | 0.296064  | -1.753405 |
| H | 6.479629  | -0.679883 | -1.417845 |

0 imaginary frequencies

E = -1128.801141

G = -1128.211933

### **$\beta$ -C (reactive conformer: D ring twist-boat conformation)**

|   |           |           |           |
|---|-----------|-----------|-----------|
| C | -2.435646 | -1.770321 | 0.567112  |
| C | -1.827650 | -0.757874 | -0.435811 |
| C | -2.539394 | 0.612925  | -0.178574 |
| C | -4.099713 | 0.650400  | -0.322544 |
| C | -4.640449 | -0.457024 | 0.628456  |
| C | -3.971348 | -1.827028 | 0.457263  |
| C | -1.751860 | 1.739422  | -0.865332 |
| C | -0.385642 | 1.974498  | -0.165944 |
| C | 0.226591  | 0.704497  | 0.525805  |
| C | -0.260166 | -0.546581 | -0.283888 |
| C | 1.783409  | 0.761174  | 0.319532  |
| C | 2.594458  | -0.508941 | 0.715613  |
| C | 2.026103  | -1.692070 | -0.102022 |
| C | 0.502386  | -1.824329 | 0.103934  |
| C | 2.493841  | 2.025919  | 0.841830  |
| C | 3.744702  | 2.228936  | -0.014944 |
| C | 4.457356  | 0.992854  | -0.396373 |
| C | 4.167883  | -0.234748 | 0.347974  |
| C | 4.996094  | -1.468440 | -0.035874 |
| O | 4.791726  | -1.740395 | -1.417338 |
| C | 2.601502  | -0.875803 | 2.217935  |
| C | 5.480482  | 1.076004  | -1.448641 |
| C | -0.141338 | 0.701275  | 2.033781  |
| C | -2.005611 | -1.312311 | -1.874826 |
| C | -4.619507 | 2.005175  | 0.220377  |
| C | -4.644960 | 0.498155  | -1.758723 |
| O | -6.054282 | -0.549741 | 0.434299  |
| H | 4.511698  | 2.861533  | 0.473385  |
| H | 3.525941  | 2.781832  | -0.942038 |
| H | -2.990067 | -1.740905 | -2.053134 |
| H | -1.278702 | -2.110849 | -2.061958 |
| H | -1.842464 | -0.539851 | -2.632596 |
| H | -2.032210 | -2.776446 | 0.403622  |
| H | -2.162863 | -1.485636 | 1.592212  |
| H | -4.279546 | -2.253810 | -0.502713 |

|   |           |           |           |
|---|-----------|-----------|-----------|
| H | -4.360177 | -2.506284 | 1.227803  |
| H | -4.421551 | 2.826741  | -0.474789 |
| H | -4.161865 | 2.257821  | 1.185132  |
| H | -5.701647 | 1.950318  | 0.363647  |
| H | -4.575816 | -0.517328 | -2.148103 |
| H | -4.110644 | 1.163322  | -2.445904 |
| H | -5.701895 | 0.773254  | -1.780875 |
| H | -2.417243 | 0.782857  | 0.896389  |
| H | -2.309577 | 2.678855  | -0.857320 |
| H | -1.591943 | 1.496666  | -1.922330 |
| H | -0.496692 | 2.767137  | 0.583687  |
| H | 0.314729  | 2.363202  | -0.917140 |
| H | -0.150029 | -0.298037 | 2.472171  |
| H | 0.559858  | 1.310331  | 2.614460  |
| H | -1.128577 | 1.128419  | 2.207796  |
| H | 0.070635  | -0.315210 | -1.308250 |
| H | 1.888434  | 0.806940  | -0.778570 |
| H | 1.648452  | -1.284858 | 2.544696  |
| H | 2.830739  | -0.021092 | 2.862258  |
| H | 3.356255  | -1.646665 | 2.410841  |
| H | 2.511212  | -2.630434 | 0.186976  |
| H | 2.231626  | -1.544274 | -1.167065 |
| H | 0.279096  | -2.115801 | 1.135458  |
| H | 0.165246  | -2.660613 | -0.517247 |
| H | 2.757022  | 1.930609  | 1.900977  |
| H | 1.866892  | 2.915615  | 0.760579  |
| H | 5.706176  | 2.100525  | -1.746536 |
| H | 5.093137  | 0.506162  | -2.309869 |
| H | 6.391845  | 0.532291  | -1.174234 |
| H | 4.689215  | -2.312597 | 0.590865  |
| H | 6.060196  | -1.280802 | 0.172565  |
| H | 5.167473  | -2.601106 | -1.645883 |
| H | 4.549337  | 0.109457  | 1.335512  |
| H | -4.440837 | -0.109679 | 1.657353  |
| H | -6.429555 | -1.145127 | 1.095786  |

0 imaginary frequencies  
E = -1128.791431  
G = -1128.204386

### TS: 1,2-Hydride Shift from C-18 to C-17 in $\beta$ -C

|   |           |           |           |
|---|-----------|-----------|-----------|
| C | -2.491642 | -1.698099 | 0.726028  |
| C | -1.890749 | -0.785811 | -0.372690 |
| C | -2.583762 | 0.610647  | -0.222094 |
| C | -4.144335 | 0.653397  | -0.355387 |
| C | -4.685939 | -0.359748 | 0.695152  |
| C | -4.029907 | -1.746418 | 0.644904  |
| C | -1.783312 | 1.665637  | -0.998930 |
| C | -0.425686 | 1.945635  | -0.304155 |
| C | 0.206237  | 0.710371  | 0.436273  |
| C | -0.318779 | -0.581639 | -0.270632 |
| C | 1.759567  | 0.759633  | 0.183947  |
| C | 2.593484  | -0.503051 | 0.601962  |
| C | 1.945126  | -1.754790 | -0.073022 |
| C | 0.434172  | -1.833725 | 0.203231  |
| C | 2.460334  | 2.040229  | 0.664609  |
| C | 3.787783  | 2.203104  | -0.077589 |
| C | 4.612885  | 0.929671  | -0.172530 |
| C | 4.023542  | -0.341876 | 0.085069  |
| C | 4.895560  | -1.578902 | -0.135177 |
| O | 4.981717  | -1.689611 | -1.548997 |
| C | 2.741293  | -0.772503 | 2.131099  |
| C | 5.962904  | 1.090813  | -0.846779 |

|   |           |           |           |
|---|-----------|-----------|-----------|
| C | -0.110869 | 0.792471  | 1.951593  |
| C | -2.101593 | -1.459223 | -1.755047 |
| C | -4.644905 | 2.056849  | 0.067826  |
| C | -4.706252 | 0.380053  | -1.767648 |
| O | -6.101785 | -0.458145 | 0.520191  |
| H | 4.409675  | 2.989704  | 0.363630  |
| H | 3.606933  | 2.512222  | -1.116495 |
| H | -3.092500 | -1.891524 | -1.876957 |
| H | -1.386520 | -2.279401 | -1.886779 |
| H | -1.946170 | -0.757074 | -2.580006 |
| H | -2.103201 | -2.720442 | 0.647929  |
| H | -2.198742 | -1.325813 | 1.716981  |
| H | -4.356853 | -2.259602 | -0.265388 |
| H | -4.412941 | -2.345705 | 1.481792  |
| H | -4.445785 | 2.809006  | -0.701509 |
| H | -4.174547 | 2.391417  | 1.000993  |
| H | -5.725950 | 2.026708  | 0.225663  |
| H | -4.647157 | -0.665460 | -2.069092 |
| H | -4.175888 | 0.979790  | -2.515550 |
| H | -5.761700 | 0.659616  | -1.802531 |
| H | -2.450112 | 0.868145  | 0.834594  |
| H | -2.330127 | 2.608431  | -1.075776 |
| H | -1.615915 | 1.331949  | -2.029579 |
| H | -0.556863 | 2.760191  | 0.418030  |
| H | 0.270725  | 2.323073  | -1.063624 |
| H | 0.042929  | -0.151593 | 2.477745  |
| H | 0.508237  | 1.550783  | 2.442522  |
| H | -1.145234 | 1.084019  | 2.130125  |
| H | -0.006509 | -0.434888 | -1.316155 |
| H | 1.842626  | 0.769411  | -0.914445 |
| H | 1.809416  | -1.144811 | 2.551488  |
| H | 3.024631  | 0.127329  | 2.684187  |
| H | 3.502711  | -1.537422 | 2.322263  |
| H | 2.417292  | -2.673791 | 0.288561  |
| H | 2.106321  | -1.709781 | -1.156640 |
| H | 0.251877  | -2.024609 | 1.266225  |
| H | 0.061924  | -2.718895 | -0.322311 |
| H | 2.632890  | 2.025708  | 1.746824  |
| H | 1.844898  | 2.920904  | 0.470459  |
| H | 6.461483  | 1.989509  | -0.477733 |
| H | 5.779194  | 1.219832  | -1.918546 |
| H | 6.628372  | 0.236076  | -0.736955 |
| H | 4.437234  | -2.457017 | 0.321273  |
| H | 5.884833  | -1.442250 | 0.321968  |
| H | 5.115801  | -2.612937 | -1.804049 |
| H | 4.776331  | 0.518170  | 0.980505  |
| H | -4.476012 | 0.077822  | 1.686935  |
| H | -6.478009 | -0.981107 | 1.239794  |

l imaginary frequency  
E = -1128.780533  
G = -1128.194071

### $\beta$ -D

|   |           |           |           |
|---|-----------|-----------|-----------|
| C | -2.516575 | -1.629061 | 0.850527  |
| C | -1.917098 | -0.803105 | -0.315841 |
| C | -2.570733 | 0.618333  | -0.241575 |
| C | -4.131769 | 0.694068  | -0.344751 |
| C | -4.675356 | -0.234160 | 0.780513  |
| C | -4.057168 | -1.639239 | 0.805031  |
| C | -1.758374 | 1.596774  | -1.100077 |
| C | -0.388720 | 1.888127  | -0.438535 |
| C | 0.243434  | 0.678754  | 0.345685  |

|   |           |           |           |
|---|-----------|-----------|-----------|
| C | -0.335816 | -0.638769 | -0.262572 |
| C | 1.792949  | 0.696729  | 0.048559  |
| C | 2.603666  | -0.589187 | 0.476194  |
| C | 1.888243  | -1.861472 | -0.047902 |
| C | 0.388092  | -1.878775 | 0.282367  |
| C | 2.514136  | 1.979951  | 0.489457  |
| C | 3.927228  | 2.047003  | -0.085880 |
| C | 4.782797  | 0.804589  | 0.277612  |
| C | 4.038182  | -0.472200 | 0.079817  |
| C | 4.760520  | -1.635485 | -0.529097 |
| O | 4.520500  | -1.139971 | -1.864541 |
| C | 2.839619  | -0.774637 | 2.040660  |
| C | 6.207012  | 0.891314  | -0.295967 |
| C | -0.022337 | 0.842861  | 1.863720  |
| C | -2.178012 | -1.555846 | -1.647537 |
| C | -4.585630 | 2.135209  | -0.003049 |
| C | -4.733262 | 0.346410  | -1.723992 |
| O | -6.096575 | -0.304821 | 0.641689  |
| H | 4.454386  | 2.933784  | 0.277957  |
| H | 3.893012  | 2.124163  | -1.179663 |
| H | -3.182111 | -1.968115 | -1.719769 |
| H | -1.487677 | -2.402061 | -1.743598 |
| H | -2.025667 | -0.909972 | -2.517642 |
| H | -2.158856 | -2.665123 | 0.827063  |
| H | -2.191485 | -1.206785 | 1.810907  |
| H | -4.418275 | -2.198293 | -0.064327 |
| H | -4.436821 | -2.174190 | 1.685671  |
| H | -4.382990 | 2.831380  | -0.822603 |
| H | -4.087317 | 2.515738  | 0.897419  |
| H | -5.663515 | 2.145267  | 0.176904  |
| H | -4.711042 | -0.717842 | -1.957395 |
| H | -4.204028 | 0.880702  | -2.520654 |
| H | -5.780967 | 0.653975  | -1.754412 |
| H | -2.407206 | 0.942241  | 0.792790  |
| H | -2.281992 | 2.546356  | -1.233460 |
| H | -1.612923 | 1.191590  | -2.108503 |
| H | -0.501427 | 2.731700  | 0.252534  |
| H | 0.300138  | 2.228804  | -1.221126 |
| H | 0.268318  | -0.029811 | 2.451678  |
| H | 0.516777  | 1.707048  | 2.263485  |
| H | -1.077175 | 1.020891  | 2.068496  |
| H | -0.044186 | -0.573272 | -1.322591 |
| H | 1.856606  | 0.675088  | -1.050717 |
| H | 1.969004  | -1.284847 | 2.451973  |
| H | 2.976966  | 0.179888  | 2.546950  |
| H | 3.705822  | -1.410941 | 2.261115  |
| H | 2.356186  | -2.764546 | 0.359828  |
| H | 1.980627  | -1.907989 | -1.142250 |
| H | 0.235588  | -1.980859 | 1.362227  |
| H | -0.029567 | -2.789080 | -0.158641 |
| H | 2.554215  | 2.061247  | 1.581572  |
| H | 1.953540  | 2.852874  | 0.145673  |
| H | 6.616249  | 1.875249  | -0.054897 |
| H | 6.206169  | 0.785606  | -1.383574 |
| H | 6.887637  | 0.151083  | 0.132622  |
| H | 4.322228  | -2.615103 | -0.351550 |
| H | 5.833499  | -1.659171 | -0.356259 |
| H | 3.745060  | -1.579594 | -2.247750 |
| H | 4.874897  | 0.812370  | 1.383537  |
| H | -4.431400 | 0.260027  | 1.737318  |
| H | -6.471872 | -0.760265 | 1.406270  |

0 imaginary frequencies  
E = -1128.786585  
G = -1128.197213

**TS: D Ring Cyclization Leading from B to  $\beta$ -C (boat-like TS)**

|   |           |           |           |
|---|-----------|-----------|-----------|
| C | -4.553213 | -0.031648 | -0.379608 |
| C | -2.493413 | -0.475054 | -0.704517 |
| C | -1.784130 | 0.814866  | -0.334013 |
| C | -2.518181 | 2.052157  | -0.875357 |
| C | -3.765099 | 2.288358  | 0.024557  |
| C | -4.373612 | 1.006437  | 0.528244  |
| C | -2.083506 | -1.616054 | 0.181252  |
| C | -0.538420 | -1.791385 | -0.008678 |
| C | 0.248577  | -0.506130 | 0.299213  |
| C | -0.209625 | 0.714160  | -0.572597 |
| C | 1.813740  | -0.744730 | 0.454695  |
| C | 2.552891  | 0.596958  | 0.127870  |
| C | 1.789831  | 1.773357  | 0.756045  |
| C | 0.431360  | 2.007396  | 0.040743  |
| C | 4.113903  | 0.607026  | 0.268998  |
| C | 4.628868  | -0.557864 | -0.626401 |
| C | 3.928750  | -1.902969 | -0.389693 |
| C | 2.394257  | -1.818670 | -0.498835 |
| C | 1.986168  | -1.227835 | 1.919751  |
| C | 4.660164  | 1.922113  | -0.341661 |
| C | 4.660129  | 0.517050  | 1.710203  |
| O | 6.038976  | -0.673608 | -0.424629 |
| C | 0.125226  | 0.623213  | -2.081326 |
| C | -2.675352 | -0.862315 | -2.159200 |
| C | -4.646339 | 0.923432  | 1.988363  |
| C | -5.343967 | -1.301651 | -0.140231 |
| O | -5.018055 | -1.888565 | 1.112490  |
| H | -4.535079 | 2.840523  | -0.534149 |
| H | -3.492499 | 2.915689  | 0.878633  |
| H | 2.963861  | -1.663458 | 2.115328  |
| H | 1.246917  | -2.002888 | 2.151405  |
| H | 1.841066  | -0.414198 | 2.636925  |
| H | 1.970905  | -2.807069 | -0.284049 |
| H | 2.122995  | -1.579745 | -1.536170 |
| H | 4.229777  | -2.291029 | 0.588796  |
| H | 4.299955  | -2.626540 | -1.127592 |
| H | 4.482516  | 2.781175  | 0.312479  |
| H | 4.205850  | 2.137381  | -1.317022 |
| H | 5.740364  | 1.836982  | -0.484048 |
| H | 4.583386  | -0.477696 | 2.149095  |
| H | 4.134951  | 1.220113  | 2.365819  |
| H | 5.719745  | 0.782004  | 1.716878  |
| H | 2.435388  | 0.716454  | -0.954683 |
| H | 2.367471  | 2.698865  | 0.701710  |
| H | 1.621768  | 1.588328  | 1.823223  |
| H | 0.564513  | 2.744012  | -0.759856 |
| H | -0.258337 | 2.462702  | 0.762038  |
| H | 0.011343  | -0.382337 | -2.489840 |
| H | -0.511727 | 1.297225  | -2.664351 |
| H | 1.152131  | 0.927317  | -2.280285 |
| H | -0.067753 | -0.213117 | 1.311399  |
| H | -1.842279 | 0.880275  | 0.760112  |
| H | -1.763462 | -1.358754 | -2.503065 |
| H | -2.862641 | -0.017517 | -2.823194 |
| H | -3.475766 | -1.596759 | -2.277328 |
| H | -2.599495 | -2.544150 | -0.075056 |
| H | -2.287187 | -1.398901 | 1.232813  |
| H | -0.329063 | -2.155442 | -1.019545 |
| H | -0.235541 | -2.594024 | 0.670301  |
| H | -2.806334 | 1.922985  | -1.922633 |

|   |           |           |           |
|---|-----------|-----------|-----------|
| H | -1.891974 | 2.945351  | -0.837470 |
| H | -5.184766 | 1.829066  | 2.298072  |
| H | -3.691760 | 0.957872  | 2.536767  |
| H | -5.187355 | 0.028799  | 2.284819  |
| H | -5.143699 | -2.001543 | -0.963884 |
| H | -6.414114 | -1.047692 | -0.193972 |
| H | -5.591360 | -2.650892 | 1.269004  |
| H | -4.626693 | 0.301618  | -1.412141 |
| H | 4.437581  | -0.256432 | -1.671302 |
| H | 6.404987  | -1.298463 | -1.063780 |

l imaginary frequency  
E = -1128.785366  
G = -1128.198115

**TS: 1,2-Methyl Shift from C-13 to C-18 in  $\beta$ -D**

|   |           |           |           |
|---|-----------|-----------|-----------|
| C | 2.470619  | -1.695351 | -0.748187 |
| C | 1.945764  | -0.787250 | 0.393123  |
| C | 2.635232  | 0.606354  | 0.210796  |
| C | 4.201375  | 0.640253  | 0.238037  |
| C | 4.666665  | -0.365471 | -0.854995 |
| C | 4.010457  | -1.749993 | -0.768333 |
| C | 1.895967  | 1.654473  | 1.053032  |
| C | 0.499698  | 1.952680  | 0.452168  |
| C | -0.201693 | 0.728884  | -0.241859 |
| C | 0.368299  | -0.579849 | 0.396174  |
| C | -1.737976 | 0.807958  | 0.122439  |
| C | -2.575589 | -0.455639 | -0.178862 |
| C | -1.892159 | -1.740211 | 0.292809  |
| C | -0.405953 | -1.819732 | -0.075975 |
| C | -2.449805 | 2.097162  | -0.314859 |
| C | -3.882464 | 2.131056  | 0.212256  |
| C | -4.746193 | 0.961268  | -0.295800 |
| C | -3.997096 | -0.378095 | -0.246208 |
| C | -3.015008 | -0.589360 | -1.895680 |
| C | -4.847888 | -1.641622 | -0.060211 |
| O | -5.099572 | -1.748924 | 1.332684  |
| C | -6.098256 | 0.939102  | 0.453123  |
| C | -0.007933 | 0.801836  | -1.776880 |
| C | 2.240701  | -1.475506 | 1.753148  |
| C | 4.677100  | 2.045896  | -0.206281 |
| C | 4.857030  | 0.351671  | 1.606136  |
| O | 6.089885  | -0.469617 | -0.776613 |
| H | -4.372874 | 3.067715  | -0.070088 |
| H | -3.870172 | 2.107351  | 1.309937  |
| H | 3.237639  | -1.907106 | 1.810329  |
| H | 1.535598  | -2.298754 | 1.918223  |
| H | 2.134762  | -0.782959 | 2.593813  |
| H | 2.085811  | -2.717487 | -0.650074 |
| H | 2.115261  | -1.318370 | -1.716784 |
| H | 4.394282  | -2.269408 | 0.115778  |
| H | 4.334414  | -2.346759 | -1.631437 |
| H | 4.534692  | 2.791989  | 0.581217  |
| H | 4.145626  | 2.390606  | -1.102150 |
| H | 5.744592  | 2.013554  | -0.438190 |
| H | 4.831624  | -0.699614 | 1.892062  |
| H | 4.370937  | 0.931941  | 2.397939  |
| H | 5.909117  | 0.643485  | 1.575856  |
| H | 2.431891  | 0.879536  | -0.831317 |
| H | 2.452127  | 2.593325  | 1.105955  |
| H | 1.794571  | 1.308708  | 2.088414  |
| H | 0.591573  | 2.764667  | -0.278602 |
| H | -0.138678 | 2.340191  | 1.255207  |
| H | -0.368477 | -0.088966 | -2.298275 |
| H | -0.521444 | 1.671703  | -2.198201 |
| H | 1.041780  | 0.911933  | -2.045096 |
| H | 0.119504  | -0.468222 | 1.462803  |
| H | -1.757752 | 0.808934  | 1.224969  |
| H | -2.351801 | -1.414619 | -2.148423 |
| H | -2.731934 | 0.359470  | -2.336300 |
| H | -4.007734 | -0.865170 | -2.262691 |
| H | -2.412293 | -2.633026 | -0.062693 |
| H | -1.984096 | -1.734040 | 1.387911  |
| H | -0.290278 | -1.970482 | -1.156006 |
| H | -0.001819 | -2.722146 | 0.392025  |
| H | -2.450603 | 2.208368  | -1.405701 |
| H | -1.900210 | 2.959496  | 0.069006  |
| H | -6.531149 | 1.940885  | 0.387034  |



|   |           |           |           |
|---|-----------|-----------|-----------|
| H | -5.971344 | 0.689580  | 1.508356  |
| H | -6.822748 | 0.245985  | 0.021313  |
| H | -4.357240 | -2.529351 | -0.463758 |
| H | -5.805174 | -1.530647 | -0.574797 |
| H | -4.574623 | -2.461969 | 1.719357  |
| H | -4.978358 | 1.138904  | -1.356974 |
| H | 4.390310  | 0.079679  | -1.827043 |
| H | 6.416818  | -0.983671 | -1.526131 |

l imaginary frequency  
E = -1128.782783  
G = -1128.193669

### Carbocation product of the 1,2-Methyl Shift from C-13 to C-18 in $\beta$ -D

|   |           |           |           |
|---|-----------|-----------|-----------|
| C | 2.398331  | -1.725822 | -0.675032 |
| C | 1.995921  | -0.772840 | 0.478475  |
| C | 2.620105  | 0.625208  | 0.148697  |
| C | 4.178188  | 0.687995  | -0.013206 |
| C | 4.535029  | -0.362528 | -1.105711 |
| C | 3.925535  | -1.752993 | -0.878190 |
| C | 1.963310  | 1.698560  | 1.026542  |
| C | 0.499320  | 1.947650  | 0.581175  |
| C | -0.230498 | 0.669073  | 0.052862  |
| C | 0.419029  | -0.597956 | 0.674576  |
| C | -1.781786 | 0.740936  | 0.613795  |
| C | -2.497589 | -0.491810 | 0.272778  |
| C | -1.868475 | -1.747883 | 0.749031  |
| C | -0.369478 | -1.862535 | 0.331006  |
| C | -2.496056 | 2.077728  | 0.330274  |
| C | -4.008294 | 1.921533  | 0.184803  |
| C | -4.335050 | 0.871522  | -0.886590 |
| C | -3.794574 | -0.545822 | -0.486291 |
| C | -3.583996 | -1.404191 | -1.780243 |
| C | -4.790647 | -1.344590 | 0.417107  |
| O | -4.808908 | -0.739553 | 1.705793  |
| C | -5.827107 | 0.897192  | -1.252559 |
| C | -0.286995 | 0.647960  | -1.489684 |
| C | 2.470601  | -1.384446 | 1.822576  |
| C | 4.562431  | 2.078309  | -0.577302 |
| C | 4.998406  | 0.481626  | 1.279381  |
| O | 5.958763  | -0.437955 | -1.188929 |
| H | -4.442381 | 2.883794  | -0.106269 |
| H | -4.467053 | 1.636327  | 1.137568  |
| H | 3.483652  | -1.776716 | 1.775286  |
| H | 1.823274  | -2.221997 | 2.106549  |
| H | 2.438823  | -0.655428 | 2.637751  |
| H | 2.051194  | -2.748029 | -0.482831 |
| H | 1.921669  | -1.402553 | -1.610553 |
| H | 4.424552  | -2.222967 | -0.024741 |
| H | 4.156915  | -2.384146 | -1.746157 |
| H | 4.498395  | 2.860156  | 0.185481  |
| H | 3.920451  | 2.369294  | -1.418257 |
| H | 5.594997  | 2.053513  | -0.934070 |
| H | 5.029863  | -0.552527 | 1.622760  |
| H | 4.599925  | 1.098390  | 2.092278  |
| H | 6.033122  | 0.786091  | 1.107172  |
| H | 2.287718  | 0.845793  | -0.873808 |
| H | 2.495951  | 2.650521  | 0.968288  |
| H | 1.990784  | 1.402830  | 2.081268  |
| H | 0.486389  | 2.705568  | -0.209469 |
| H | -0.046959 | 2.381760  | 1.423722  |
| H | -0.737844 | -0.269602 | -1.880953 |
| H | -0.860179 | 1.492977  | -1.880335 |
| H | 0.711193  | 0.726532  | -1.920603 |

|   |           |           |           |
|---|-----------|-----------|-----------|
| H | 0.302775  | -0.451369 | 1.757354  |
| H | -1.617004 | 0.645425  | 1.698258  |
| H | -2.416450 | -2.636516 | 0.438715  |
| H | -1.906941 | -1.708427 | 1.847708  |
| H | -0.318015 | -2.092890 | -0.736727 |
| H | 0.032655  | -2.733530 | 0.854904  |
| H | -2.099327 | 2.530960  | -0.583222 |
| H | -2.261848 | 2.773814  | 1.140284  |
| H | -6.068287 | 1.864460  | -1.702753 |
| H | -6.464716 | 0.785177  | -0.369821 |
| H | -6.104732 | 0.128860  | -1.981148 |
| H | -4.482140 | -2.394168 | 0.482689  |
| H | -5.774006 | -1.313202 | -0.061639 |
| H | -5.496504 | -1.143154 | 2.252956  |
| H | -3.779906 | 1.153620  | -1.792949 |
| H | 4.137644  | 0.029653  | -2.058504 |
| H | 6.210351  | -0.970109 | -1.954773 |
| H | -4.548247 | -1.495714 | -2.285995 |
| H | -2.894113 | -0.912259 | -2.468531 |
| H | -3.218427 | -2.411397 | -1.571396 |

0 imaginary frequencies  
E = -1128.808985  
G = -1128.219316

## References

- [1] V. L. Challinor, S. Chap, R. P. Lehmann, P. V. Bernhardt and J. J. De Voss, *J. Nat. Prod.* 2013, **76**, 485–488.
- [2] H. Takikawa and M. Sugiyama, Jpn. Kokai Tokkyo Koho JP 2012206962, 2012.
- [3] G. Brownlie and F. S. Spring, R. Stevenson, W. S. Strachan, *J. Chem. Soc. (Resumed)* 1956, 2419-2427.
- [4] G. M. Sheldrick, *Acta Crystallogr., Sect. A: Found. Crystallogr.* 2008, **A64**, 112-122.
- [5] L. J. Farrugia, *J. Appl. Crystallogr.* 1999, **32**, 837-838.
- [6] L. J. Farrugia, *J. Appl. Crystallogr.* 1997, **30**, 565.
- [7] R. W. W. Hooft, L. H. Straver and A. L. Spek, *J. Appl. Crystallogr.* 2008, **41**, 96-103.
- [8] M. J. Frisch, G. W. Trucks, H. B. Schlegel, G. E. Scuseria, M. A. Robb, J. R. Cheeseman, G. Scalmani, V. Barone, B. Mennucci, G. A. Petersson, H. Nakatsuji, M. Caricato, X. Li, H. P. Hratchian, A. F. Izmaylov, J. Bloino, G. Zheng, J. L. Sonnenberg, M. Hada, M. Ehara, K. Toyota, R. Fukuda, J. Hasegawa, M. Ishida, T. Nakajima, Y. Honda, O. Kitao, H. Nakai, T. Vreven, J. A. Montgomery, Jr., J. E. Peralta, F. Ogliaro, M. Bearpark, J. J. Heyd, E. Brothers, K. N. Kudin, V. N. Staroverov, R. Kobayashi, J. Normand, K. Raghavachari, A. Rendell, J. C. Burant, S. S. Iyengar, J. Tomasi, M. Cossi, N. Rega, J. M. Millam, M. Klene, J. E. Knox, J. B. Cross, V. Bakken, C. Adamo, J. Jaramillo, R. Gomperts, R. E. Stratmann, O. Yazyev, A. J. Austin, R. Cammi, C. Pomelli, J. W. Ochterski, R. L. Martin, K. Morokuma, V. G. Zakrzewski, G. A. Voth, P. Salvador, J. J. Dannenberg, S. Dapprich, A. D. Daniels, Ö. Farkas, J. B. Foresman, J. V. Ortiz, J. Cioslowski, D. J. Fox, Gaussian 09, Revision D.01, Gaussian, Inc., Wallingford CT, 2013.
- [9] A. D. Becke, *J. Chem. Phys.* 1993, **98**, 5648-5652.
- [10] S. Miertuš, E. Scrocco and J. Tomasi, *Chem. Phys.* 1981, **55**, 117-129.
- [11] C. Adamo and V. Barone, *J. Chem. Phys.*, 1998, **108**, 664-675.
- [12] a) W. J. Hehre, R. Ditchfield and J. A. Pople, *J. Chem. Phys.* 1972, **56**, 2257-2261; b) P. C. Hariharan and J. A. Pople, *Theor. Chim. Acta* 1973, **28**, 213-222.
- [13] a) M. W. Lodewyk, C. Soldi, P. B. Jones, M. M. Olmstead, J. R. Larrucea, J. T. Shaw and D. J. Tantillo, *J. Am. Chem. Soc.* 2012, **134**, 18550-18553; b) Scripts, test cases and other miscellany can be found at the Chemical Shift Repository <http://cheshirenmr.info/index.htm>.
- [14] a) S. G. Smith and J. M. Goodman, *J. Am. Chem. Soc.* 2010, **132**, 12946-12959; b) A Java applet for calculation of the DP4 probability can be found at: Assignment of stereochemistry and structure using NMR and DP4, <http://www-jmg.ch.cam.ac.uk/tools/nmr/DP4/>
- [15] P. J. Stephens and D. M. McCann, J. R. Cheeseman, M. J. Frisch, *Chirality* 2005, **17**, S52-S64.
- [16] a) C. Gonzalez and H. B. Schlegel, *J. Chem. Phys.* 1989, **90**, 2154-2161; b) C. Gonzalez and H. B. Schlegel, *J. Phys. Chem.* 1990, **94**, 5523-5527.
